# Supplementary material
Source: publisher site journal article supplement (https://www.dovepress.com/article/476494)
Supplement: Supplementary file 1 [file get_supplementary_file.php]

**Supplementary Information**

**Supplementary Table 1** the primer sequences

| Name | Primer sequences |
| --- | --- |
| *sPLA2* | F:AGGGGAGCCTTCTGGAGTTTGG |
| *sPLA2* | R:CTCTGCCACCCACACCACAATG |
| *cPLA2* | F:GAGCGAGGGGCTTTATTCCA |
| *cPLA2* | R:ACAGACCAGCAACGTAGGTC |
| *PEMT* | F:TGGTAGCAAGGTGGGAGCAGAG |
| *PEMT* | R:CGGAGGATGTTCAGAAGCAGGATG |
| *GAPDH* | F:CTGGAGAAACCTGCCAAGTATG |
| *GAPDH* | R:GGTGGAAGAATGGGAGTTGCT |

**Supplementary Table 2** internal standard substances

| **NO.** | **Name** | **Concentration (μg/mL)** | **NO.** | **Name** | **Concentration (μg/mL)** |
| --- | --- | --- | --- | --- | --- |
| 1 | Carnitine C2:0-d3 | 0.06 | 8 | CDCA-d4 | 0.5625 |
| 2 | Carnitine C8:0-d3 | 0.0375 | 9 | CA-d4 | 0.694 |
| 3 | Carnitine C10:0-d3 | 0.0375 | 10 | Trp-d5 | 1.594 |
| 4 | Carnitine C16:0-d3 | 0.0565 | 11 | Phe-d5 | 1.35 |
| 5 | LPC 19:0 | 0.2815 | 12 | SM 12:0 | 0.2815 |
| 6 | FFA C16:0-d3 | 0.9375 | 13 | Choline-d4 | 0.75 |
| 7 | FFA C18:0-d3 | 0.9375 |  |  |  |

**Supplementary Table 3** Information about amino acid

| No. | Name | Abbr. | CAS | Molecular formula | Molecular mass |
| --- | --- | --- | --- | --- | --- |
| 1 | S-sulfo-L-cysteine | / | 1637-71-4 | C3H7NO5S2 | 201.221 |
| 2 | N-Acetylneuraminic acid | / | 131-48-6 | C11H19NO9 | 309.27 |
| 3 | Serine | Ser | 302-84-1 | C3H7NO3 | 105.09 |
| 4 | Glycine | Gly | 56-40-6 | C2H5NO2 | 75.07 |
| 5 | Taurine | / | 107-35-7 | C2H7NO3S | 125.147 |
| 6 | Threonine | Thr | 80-68-2 | C4H9NO3 | 119.12 |
| 7 | Glutamic acid | Glu | 56-86-0 | C5H9NO4 | 147.13 |
| 8 | Ornithine | Orn | 70-26-8 | C5H12N2O2 | 132.16 |
| 9 | Histidine | His | 4998-57-6 | C6H9N3O2 | 155.15 |
| 10 | Glutamine | Gln | 56-85-9 | C10H18N2O5 | 146.14 |
| 11 | O-Acetyl-L-Serine | / | 66638-22-0 | C5H9NO4 | 147.13 |
| 12 | Proline | Pro | 147-85-3 | C5H9NO2 | 115.13 |
| 13 | Lysine | Lys | 56-87-1 | C6H14N2O2 | 146.19 |
| 14 | Ethanolamine | EtN | 141-43-5 | C2H7NO | 61.08 |
| 15 | Arginine | Arg | 74-79-3 | C6H14N4O2 | 174.2 |
| 16 | 1-Methyl-L-histidine | / | 332-80-9 | C7H11N3O2 | 169.181 |
| 17 | N-Acetylornithine | / | 6205-08-9 | C7H14N2O3 | 174.2 |
| 18 | Homocysteine | Hcy | 454-29-5 | C4H9NO2S | 135.18 |
| 19 | N,N-Dimethylglycine | / | 1118-68-9 | C4H9NO2 | 103.12 |
| 20 | Choline | / | [62-49-7](https://www.chemsrc.com/baike/830661.html) | C5H14NO | 104.17 |
| 21 | Valine | Val | 4998-57-6 | C5H11NO2 | 117.15 |
| 22 | Methionine | Met | 63-68-3 | C5H11NO2S | 149.21 |
| 24 | N-Acetyl-L-arginine | / | 155-84-0 | C8H16N4O3 | 216.2376 |
| 25 | Tyrosine | Tyr | 60-18-4 | C14H19NO5 | 181.19 |
| 27 | Leucine | Leu | 327-57-1 | C14H19NO4 | 131.17 |
| 28 | D-Pantothenic acid | / | 79-83-4 | C9H17NO5 | 219.24 |
| 29 | DL-kynurenine | / | 343-65-7 | C10H12N2O3 | 208.22 |
| 30 | phenylalanine | Phe | 150-30-1 | C10H13NO2 | 165.19 |
| 31 | 3-Indoxyl-beta-D-glucopyranoside | / | 487-60-5 | C14H17NO6 | 295.29 |
| 32 | Hippuric acid | / | 495-69-2 | C9H9NO3 | 179.17 |
| 33 | Tryptophan | Trp | 73-22-3 | C11H12N2O2 | 204.23 |
| 34 | 3-Methylcatechol | / | 488-17-5 | C7H8O2 | 124.14 |
| 35 | 3-indole-3-lactic acid | / | 1821-52-9 | C11H11NO3 | 205.21 |

**Supplementary Table 4** The Chromatography‑mass spectrometry acquisition conditions of lipid Pseudotargeted metabolomics

**Table S4-1 Chromatography analysis conditions of lipid Pseudotargeted metabolomics**

| positive and negative ion mode | | | | | |
| --- | --- | --- | --- | --- | --- |
| chromatographic column | BEH C8 column (2.1×100 mm×1.7 μm, Waters, Milford, MA, United States) | | | | |
| flow rate | | 0.2mL/min | injection volume | | 5 μL |
| time (min) | | solvent A：60%acitrile / aqueous solution  （10mM ammonium acetate） | | solvent B：Propanol: acetonitrile: = 9:1  （v/v，10mMammonium acetate ） | |
| 0.0 | | 68 | | 32 | |
| 1.5 | | 68 | | 32 | |
| 15.5 | | 15 | | 85 | |
| 15.6 | | 15 | | 85 | |
| 18 | | 3 | | 97 | |
| 18.1 | | 3 | | 97 | |
| 23 | | 68 | | 32 | |

**Table S4-2 Mass Spectrometry Conditions of lipid Pseudotargeted metabolomics**

| positive-ion mode | | | | | |
| --- | --- | --- | --- | --- | --- |
| Instrument type | | AB 5500 (SCIEX, USA) | | | |
| Spray Voltage | | 3.5 kV | Temperature(TEM): | | 300 ℃ |
| Curtain Gas(CUR): | | 35 Arb | Collision Gas(CAD) | | Medium |
| Ion Source Gas1(GS1) | | 60 Arb | Ion Source Gas1(GS2) | | 60 Arb |
| Entrance Potential(EP): | | 10 | CXP | | 13 |
| Other parameters | | Defaults | |
| negative-ion mode | | | | | |
| Instrument type | AB 5500 (SCIEX, USA) | | | | |
| Spray Voltage | -3kV | | Temperature(TEM): | | 300 ℃ |
| Curtain Gas(CUR): | 35 Arb | | Collision Gas(CAD) | | Medium |
| Ion Source Gas1(GS1) | 60 Arb | | Ion Source Gas1(GS2) | | 60 Arb |
| Entrance Potential(EP): | 10 | | CXP | | 13 |
| Other parameters | Defaults | | |  | |

**Supplementary Table 5** The Chromatography‑mass spectrometry acquisition conditions of Amino acids targeted metabolomics

**Table S5-1 Chromatography analysis conditions of Amino acids targeted metabolomics**

| SWITCH | | | | | | |
| --- | --- | --- | --- | --- | --- | --- |
| chromatographic column | Kinetex PFP C18 (250*4.6mm，5um) | | | | | |
| flow rate | | 0.50 mL/min | | injection volume | | 2 μL |
| time (min) | | | solvent A：water  0.1%acetic acid | | solvent B：methyl alcohol  0.1%acetic acid | |
| 0.00 | | | 15 | | 85 | |
| 10.00 | | | 85 | | 15 | |
| 16.00 | | | 85 | | 15 | |
| 17.00 | | | 15 | | 85 | |
| 20.00 | | | 15 | | 85 | |

**Table S5-2 Mass Spectrometry Conditions of Amino acids targeted metabolomics**

| SWITCH | | | |
| --- | --- | --- | --- |
| Instrument type | Thermo TSQ Quautiva | | |
| IS | Pos：3500.0V  Neg：2500.0 V | TEM | 550.0 ℃ |
| Sheath GAS | 40.0 psi | Aux GAS | 10 psi |
| Ion Transfer TUBE Temp | 350℃ | Vaporizer Temp | 350℃ |
| Other parameters | Defaults |  |  |

**Supplementary Table 6**: **Differential metabolites of DAT versus RNC**

| Var ID | Compounds | Fold Change  (FC) | log2(FC) | P | VIP | Ion mode | Trend |
| --- | --- | --- | --- | --- | --- | --- | --- |
| V668 | 12-HEPE | 0.45177 | -1.1463 | 0.028443 | 1.923633995 | neg | ↓ |
| V690 | 19(20)-EpDPE | 1.6907 | 0.75766 | 0.03331 | 1.79589321 | neg | ↑ |
| V672 | 5-HEPE | 0.3747 | -1.4162 | 0.019502 | 1.934231758 | neg | ↓ |
| V611 | 8,9-EET | 1.6541 | 0.72606 | 0.0091831 | 2.07066371 | neg | ↑ |
| V656 | 9,10-DiHOME | 0.62484 | -0.67844 | 0.022169 | 1.95676097 | neg | ↓ |
| V592 | Alpha-Tocopherol | 1.9779 | 0.98398 | 0.018856 | 1.919332601 | neg | ↑ |
| V19 | CAR 14:0 | 1.5572 | 0.63895 | 0.037286 | 1.561881682 | pos | ↑ |
| V9 | CAR 16:0 | 1.6337 | 0.70817 | 0.020004 | 1.693496573 | pos | ↑ |
| V21 | CAR 16:1 | 1.7555 | 0.81191 | 0.034361 | 1.581811378 | pos | ↑ |
| V23 | CAR 16:3 | 5.5418 | 2.4703 | 0.00038896 | 2.194629042 | pos | ↑ |
| V24 | CAR 16:4 | 4.3946 | 2.1357 | 3.95E-05 | 2.332050456 | pos | ↑ |
| V26 | CAR 18:0 | 2.6234 | 1.3914 | 0.0011515 | 2.099656991 | pos | ↑ |
| V27 | CAR 18:1 | 2.2805 | 1.1893 | 0.00074723 | 2.146109602 | pos | ↑ |
| V29 | CAR 18:3 | 2.0257 | 1.0184 | 0.025329 | 1.644987227 | pos | ↑ |
| V30 | CAR 19:0 | 2.0049 | 1.0036 | 0.036869 | 1.558928904 | pos | ↑ |
| V31 | CAR 20:0 | 2.3429 | 1.2283 | 0.0044057 | 1.944242913 | pos | ↑ |
| V32 | CAR 20:1 | 3.0481 | 1.6079 | 0.00094933 | 2.122990677 | pos | ↑ |
| V33 | CAR 20:2 | 1.9506 | 0.96395 | 0.0043318 | 1.948100779 | pos | ↑ |
| V37 | CAR 21:0 | 4.0926 | 2.033 | 0.0048699 | 1.926020352 | pos | ↑ |
| V38 | CAR 22:0 | 2.8769 | 1.5245 | 0.0081549 | 1.854976676 | pos | ↑ |
| V39 | CAR 22:1 | 1.852 | 0.88906 | 0.00079387 | 2.132856142 | pos | ↑ |
| V42 | CAR 22:4 | 1.7851 | 0.83601 | 0.0066824 | 1.875239501 | pos | ↑ |
| V44 | CAR 23:0 | 2.4487 | 1.292 | 0.0056816 | 1.909437236 | pos | ↑ |
| V45 | CAR 24:0 | 2.4322 | 1.2822 | 0.0076871 | 1.863191718 | pos | ↑ |
| V46 | CAR 24:1 | 2.8104 | 1.4908 | 0.036513 | 1.567285466 | pos | ↑ |
| V48 | CAR 24:4 | 1.64 | 0.71371 | 0.004163 | 1.94466567 | pos | ↑ |
| V57 | CE 15:0 | 0.63687 | -0.65093 | 0.047715 | 1.489539678 | pos | ↓ |
| V94 | Cer 34:3-3 | 2.0105 | 1.0075 | 0.034996 | 1.557533618 | pos | ↑ |
| V96 | Cer 35:3-1 | 1.7385 | 0.79787 | 0.011988 | 1.786976861 | pos | ↑ |
| V97 | Cer 35:4 | 1.5695 | 0.65035 | 0.014886 | 1.751783312 | pos | ↑ |
| V110 | Cer 38:2-5 | 2.7724 | 1.4711 | 0.00011917 | 2.26677006 | pos | ↑ |
| V126 | Cer 40:1-3 | 2.5136 | 1.3298 | 0.0013114 | 2.073160262 | pos | ↑ |
| V127 | Cer 40:1-4 | 2.311 | 1.2085 | 0.016917 | 1.707129883 | pos | ↑ |
| V128 | Cer 40:1-5 | 0.45497 | -1.1362 | 0.021963 | 1.66122671 | pos | ↓ |
| V129 | Cer 40:2-1 | 1.9779 | 0.98397 | 0.0094209 | 1.815550052 | pos | ↑ |
| V131 | Cer 40:2-4 | 2.2511 | 1.1706 | 0.0024845 | 2.003452185 | pos | ↑ |
| V136 | Cer 40:4-3 | 2.2375 | 1.1619 | 0.018592 | 1.701168146 | pos | ↑ |
| V138 | Cer 40:5-3 | 2.2432 | 1.1656 | 0.0083353 | 1.852296987 | pos | ↑ |
| V139 | Cer 40:5-4 | 1.6069 | 0.68431 | 0.028317 | 1.624424522 | pos | ↑ |
| V142 | Cer 41:1-2 | 2.0026 | 1.0019 | 0.0015928 | 2.054235957 | pos | ↑ |
| V143 | Cer 42:0-2 | 1.9861 | 0.98996 | 0.014293 | 1.740461273 | pos | ↑ |
| V145 | Cer 42:1-3 | 2.4229 | 1.2767 | 0.0019431 | 2.033085073 | pos | ↑ |
| V146 | Cer 42:1-4 | 2.1634 | 1.1133 | 0.00029194 | 2.201840119 | pos | ↑ |
| V147 | Cer 42:2-3 | 2.7594 | 1.4643 | 2.20E-06 | 2.430704694 | pos | ↑ |
| V148 | Cer 42:2-4 | 1.6085 | 0.68575 | 0.024755 | 1.638106153 | pos | ↑ |
| V159 | Cer 44:1-1 | 3.4884 | 1.8026 | 0.019198 | 1.683724267 | pos | ↑ |
| V160 | Cer 44:1-2 | 2.4496 | 1.2925 | 0.019151 | 1.687720517 | pos | ↑ |
| V161 | Cer 44:1-3 | 2.2017 | 1.1386 | 0.0172 | 1.71577872 | pos | ↑ |
| V162 | Cer 44:2-2 | 3.5047 | 1.8093 | 0.029607 | 1.595270818 | pos | ↑ |
| V591 | CL(72:8_20:4)-2H | 7.7804 | 2.9598 | 0.0067981 | 2.317334821 | neg | ↑ |
| V166 | CoQ10 | 1.6082 | 0.68546 | 0.030192 | 1.590514677 | pos | ↑ |
| V203 | DG 33:2-6 | 3.9207 | 1.9711 | 0.048619 | 1.479693036 | pos | ↑ |
| V219 | DG 34:2-7 | 0.5293 | -0.91784 | 0.029358 | 1.606039193 | pos | ↓ |
| V248 | DG 36:1-9 | 3.3419 | 1.7407 | 0.049685 | 1.47898715 | pos | ↑ |
| V267 | DG 36:5-2 | 1.8512 | 0.88846 | 0.041735 | 1.524533579 | pos | ↑ |
| V270 | DG 36:5-5 | 3.166 | 1.6627 | 0.033808 | 1.570042285 | pos | ↑ |
| V274 | DG 36:6-4 | 2.2405 | 1.1638 | 0.027522 | 1.615034318 | pos | ↑ |
| V283 | DG 37:3-2 | 3.1719 | 1.6653 | 0.032687 | 1.591627416 | pos | ↑ |
| V287 | DG 37:5-2 | 2.2018 | 1.1387 | 0.03387 | 1.571639532 | pos | ↑ |
| V302 | DG 38:3-2 | 2.1287 | 1.0899 | 0.024944 | 1.646054518 | pos | ↑ |
| V307 | DG 38:4-3 | 2.7459 | 1.4573 | 0.036934 | 1.55289033 | pos | ↑ |
| V309 | DG 38:5-1 | 3.7326 | 1.9002 | 0.033809 | 1.573362033 | pos | ↑ |
| V347 | DG 40:1-6 | 4.7402 | 2.2449 | 0.00041932 | 2.197408457 | pos | ↑ |
| V354 | DG 40:3-1 | 3.6059 | 1.8504 | 0.038022 | 1.5444022 | pos | ↑ |
| V357 | DG 40:4-8 | 3.8116 | 1.9304 | 0.025881 | 1.629331409 | pos | ↑ |
| V378 | DG 41:1-3 | 0.29532 | -1.7596 | 0.013756 | 1.756009742 | pos | ↓ |
| V379 | DG 41:2-1 | 0.27866 | -1.8434 | 0.0097024 | 1.822859768 | pos | ↓ |
| V385 | DG 42:2-2 | 2.5345 | 1.3417 | 0.041562 | 1.529042784 | pos | ↑ |
| V411 | DG 44:1-3 | 1.9977 | 0.99832 | 0.031639 | 1.578159219 | pos | ↑ |
| V606 | DS/-SDS/w-SDS | 2.883 | 1.5276 | 0.00065908 | 2.53893987 | neg | ↑ |
| V607 | DS/-SDS/w-SDS | 4.5088 | 2.1727 | 0.0035238 | 2.399878985 | neg | ↑ |
| V600 | EQYDS/ZQYDS/TYDS/SQYDS/-HBDS/XQYDSY | 2.7359 | 1.452 | 0.016718 | 2.149674489 | neg | ↑ |
| V14 | FA(14:1) | 1.8377 | 0.87787 | 0.043715 | 1.713620358 | neg | ↑ |
| V35 | FA(20:5) | 0.50196 | -0.99435 | 0.049194 | 1.797972407 | neg | ↓ |
| V426 | Fludrocortisone acetate | 0.22364 | -2.1608 | 0.018337 | 1.70846446 | pos | ↓ |
| V442 | Hex2Cer 34:2-2 | 4.0743 | 2.0266 | 0.020873 | 1.682009703 | pos | ↑ |
| V449 | Hex2Cer 35:3-1 | 1.5377 | 0.62078 | 0.045676 | 1.493912014 | pos | ↑ |
| V455 | Hex2Cer 36:2-5 | 1.9486 | 0.96241 | 0.019552 | 1.687252299 | pos | ↑ |
| V463 | Hex2Cer 37:0-2 | 0.31909 | -1.648 | 0.0023406 | 2.010914878 | pos | ↓ |
| V484 | Hex2Cer 40:1-3 | 2.0034 | 1.0025 | 0.019863 | 1.67742624 | pos | ↑ |
| V486 | Hex2Cer 40:2-4 | 2.5452 | 1.3478 | 0.01798 | 1.714436117 | pos | ↑ |
| V499 | Hex2Cer 42:4-2 | 0.37348 | -1.4209 | 0.010431 | 1.798152919 | pos | ↓ |
| V504 | Hex2Cer 44:1-1 | 4.1918 | 2.0676 | 0.033747 | 1.567565378 | pos | ↑ |
| V532 | HexCer 36:4-2 | 0.42536 | -1.2333 | 0.00025203 | 2.218751601 | pos | ↓ |
| V557 | HexCer 38:7-1 | 0.53208 | -0.91028 | 0.035478 | 1.550776935 | pos | ↓ |
| V560 | HexCer 39:1-4 | 2.5244 | 1.3359 | 0.0072563 | 1.876146149 | pos | ↑ |
| V561 | HexCer 39:2-1 | 2.5234 | 1.3353 | 0.022721 | 1.655427169 | pos | ↑ |
| V571 | HexCer 40:5-4 | 4.0512 | 2.0184 | 0.013236 | 1.767583234 | pos | ↑ |
| V573 | HexCer 40:6-1 | 2.4691 | 1.304 | 0.005775 | 1.89984545 | pos | ↑ |
| V576 | HexCer 40:7-1 | 2.6117 | 1.385 | 0.00064294 | 2.154016868 | pos | ↑ |
| V643 | Lipoxin A4 | 0.58226 | -0.78027 | 0.014331 | 1.97944107 | neg | ↓ |
| V600 | LPC 12:0 | 0.59491 | -0.74925 | 0.034722 | 1.557426589 | pos | ↓ |
| V601 | LPC 13:0 | 0.50375 | -0.98922 | 0.021171 | 1.688360065 | pos | ↓ |
| V611 | LPC 17:2 | 0.56146 | -0.83274 | 0.0022475 | 2.02300097 | pos | ↓ |
| V615 | LPC 18:3 | 1.7363 | 0.79604 | 0.002199 | 2.017786796 | pos | ↑ |
| V616 | LPC 18:4-1 | 1.6148 | 0.69138 | 0.016123 | 1.721994357 | pos | ↑ |
| V620 | LPC 20:2 | 0.52856 | -0.91987 | 0.00020988 | 2.233518629 | pos | ↓ |
| V627 | LPC 22:2 | 0.57198 | -0.80597 | 0.00042825 | 2.17803745 | pos | ↓ |
| V641 | LPC O-18:2-2 | 1.6181 | 0.69434 | 0.0012045 | 2.08898543 | pos | ↑ |
| V1 | LPE 16:0 | 1.6844 | 0.75226 | 0.0021848 | 2.03125826 | pos | ↑ |
| V651 | LPE 16:0-2 | 1.6893 | 0.7564 | 0.0016045 | 2.064080382 | pos | ↑ |
| V657 | LPE 18:0 | 1.7836 | 0.83478 | 0.0027191 | 2.002971513 | pos | ↑ |
| V658 | LPE 18:1 | 1.6449 | 0.71799 | 0.043207 | 1.520134239 | pos | ↑ |
| V666 | LPE 20:3 | 1.695 | 0.76128 | 0.0039527 | 1.96038209 | pos | ↑ |
| V667 | LPE 20:4 | 1.9889 | 0.99195 | 0.0064156 | 1.888677806 | pos | ↑ |
| V675 | LPE 22:5 | 1.6816 | 0.74983 | 0.016125 | 1.73230485 | pos | ↑ |
| V676 | LPE 22:6 | 2.2122 | 1.1455 | 0.0076549 | 1.86310284 | pos | ↑ |
| V680 | LPE O-18:3 | 1.8197 | 0.86367 | 0.008398 | 1.844777064 | pos | ↑ |
| V4 | LPE(16:0) | 1.5918 | 0.67062 | 0.012972 | 2.02546233 | neg | ↑ |
| V472 | PA(17:0_20:4)-H | 0.66162 | -0.59593 | 0.04584 | 1.844969167 | neg | ↓ |
| V488 | PA(18:1_18:1)-H | 1.7368 | 0.79644 | 0.025252 | 1.851568596 | neg | ↑ |
| V490 | PA(18:1_18:3)-H | 2.6883 | 1.4267 | 0.029304 | 1.911499064 | neg | ↑ |
| V505 | PA(18:2_20:2)-H | 0.63051 | -0.66541 | 0.021085 | 1.983634041 | neg | ↓ |
| V528 | PA(19:0_22:6)-H | 1.7413 | 0.80016 | 0.0061809 | 2.143876786 | neg | ↑ |
| V537 | PA(20:0_22:6)-H | 2.0447 | 1.0319 | 0.0061879 | 2.140139531 | neg | ↑ |
| V542 | PA(20:1_20:5)-H | 0.61668 | -0.69741 | 0.038287 | 1.78970077 | neg | ↓ |
| V692 | PC 25:0 | 0.45718 | -1.1292 | 0.017259 | 1.711901325 | pos | ↓ |
| V719 | PC 32:4 | 4.2279 | 2.0799 | 0.0026964 | 1.994687879 | pos | ↑ |
| V720 | PC 32:5 | 2.3087 | 1.2071 | 0.0047062 | 1.920846088 | pos | ↑ |
| V729 | PC 34:0 | 1.5218 | 0.60581 | 0.0077362 | 1.8596451 | pos | ↑ |
| V734 | PC 34:5 | 3.2257 | 1.6896 | 0.012281 | 1.774963824 | pos | ↑ |
| V735 | PC 34:6 | 5.0309 | 2.3308 | 0.0020727 | 2.031805275 | pos | ↑ |
| V750 | PC 36:7 | 4.184 | 2.0649 | 0.0010673 | 2.099390248 | pos | ↑ |
| V760 | PC 38:1-1 | 1.7299 | 0.79067 | 0.010317 | 1.812905731 | pos | ↑ |
| V771 | PC 39:2 | 0.62378 | -0.6809 | 0.017098 | 1.716269955 | pos | ↓ |
| V772 | PC 39:3 | 0.65793 | -0.604 | 0.021832 | 1.666491566 | pos | ↓ |
| V773 | PC 39:4-1 | 0.64607 | -0.63024 | 0.029751 | 1.596530338 | pos | ↓ |
| V774 | PC 39:5-1 | 0.16699 | -2.5822 | 0.00083626 | 2.136743239 | pos | ↓ |
| V792 | PC 41:3 | 0.42532 | -1.2334 | 0.034151 | 1.581750463 | pos | ↓ |
| V806 | PC 42:8 | 0.55065 | -0.86079 | 0.0091482 | 1.822801711 | pos | ↓ |
| V811 | PC 43:3 | 0.57624 | -0.79526 | 0.011448 | 1.802012796 | pos | ↓ |
| V812 | PC 43:4 | 0.63125 | -0.66371 | 0.0021702 | 2.023581846 | pos | ↓ |
| V814 | PC 43:6 | 0.36825 | -1.4412 | 0.0015033 | 2.067505503 | pos | ↓ |
| V824 | PC 44:6 | 0.60516 | -0.72461 | 0.0032222 | 1.974566063 | pos | ↓ |
| V831 | PC 45:3 | 0.61439 | -0.70278 | 0.019486 | 1.692474891 | pos | ↓ |
| V832 | PC 45:4 | 0.65317 | -0.61447 | 0.0036098 | 1.962189735 | pos | ↓ |
| V833 | PC 45:5 | 0.45004 | -1.1519 | 0.0002863 | 2.213323964 | pos | ↓ |
| V834 | PC 45:6 | 0.64346 | -0.63608 | 0.017993 | 1.712752496 | pos | ↓ |
| V848 | PC 48:0 | 1.6554 | 0.72716 | 0.0031297 | 1.97817605 | pos | ↑ |
| V849 | PC 48:1 | 1.574 | 0.65447 | 0.024802 | 1.639156638 | pos | ↑ |
| V876 | PC O-32:2 | 0.55938 | -0.8381 | 0.023745 | 1.660424005 | pos | ↓ |
| V879 | PC O-33:0 | 1.5423 | 0.62509 | 0.027605 | 1.623088411 | pos | ↑ |
| V882 | PC O-33:3 | 4.2126 | 2.0747 | 0.0035697 | 1.964930401 | pos | ↑ |
| V883 | PC O-33:4 | 4.1857 | 2.0655 | 0.0012656 | 2.07924264 | pos | ↑ |
| V889 | PC O-34:5-1 | 0.1857 | -2.429 | 0.028495 | 1.623505998 | pos | ↓ |
| V895 | PC O-35:5 | 0.38362 | -1.3822 | 0.044472 | 1.520232543 | pos | ↓ |
| V901 | PC O-36:5-1 | 1.5024 | 0.58723 | 0.0092096 | 1.825679099 | pos | ↑ |
| V919 | PC O-40:2-1 | 0.64473 | -0.63323 | 0.011596 | 1.786864567 | pos | ↓ |
| V921 | PC O-40:4-1 | 0.63146 | -0.66323 | 0.019269 | 1.6869816 | pos | ↓ |
| V925 | PC O-40:8 | 0.6275 | -0.67232 | 0.027567 | 1.620322628 | pos | ↓ |
| V930 | PC O-42:3-1 | 0.45052 | -1.1503 | 0.039343 | 1.545442021 | pos | ↓ |
| V935 | PC O-42:8 | 1.5464 | 0.62893 | 0.0089472 | 1.836350168 | pos | ↑ |
| V942 | PC O-44:3-1 | 0.56458 | -0.82476 | 0.020142 | 1.686081971 | pos | ↓ |
| V949 | PE 27:2 | 1.6533 | 0.72538 | 0.011572 | 1.780017888 | pos | ↑ |
| V957 | PE 31:0 | 1.8792 | 0.9101 | 0.027602 | 1.603758849 | pos | ↑ |
| V967 | PE 33:2 | 2.1003 | 1.0706 | 0.023837 | 1.647869431 | pos | ↑ |
| V5 | PE 34:0 | 2.7126 | 1.4397 | 0.00015332 | 2.252591968 | pos | ↑ |
| V973 | PE 34:5 | 1.8069 | 0.85354 | 0.017145 | 1.712724162 | pos | ↑ |
| V982 | PE 36:0 | 3.2232 | 1.6885 | 0.021732 | 1.664087186 | pos | ↑ |
| V983 | PE 36:1-1 | 3.4805 | 1.7993 | 0.021083 | 1.673163546 | pos | ↑ |
| V986 | PE 36:4 | 1.9591 | 0.97018 | 0.048285 | 1.483614185 | pos | ↑ |
| V1002 | PE 38:3-1 | 2.1054 | 1.0741 | 0.033245 | 1.575371849 | pos | ↑ |
| V1003 | PE 38:4-1 | 2.1424 | 1.0992 | 0.028905 | 1.607600526 | pos | ↑ |
| V1005 | PE 38:6 | 3.6482 | 1.8672 | 0.0082146 | 1.846077383 | pos | ↑ |
| V1006 | PE 38:7-1 | 2.0612 | 1.0435 | 0.023113 | 1.657556664 | pos | ↑ |
| V1008 | PE 38:9 | 2.0206 | 1.0148 | 0.01972 | 1.678593977 | pos | ↑ |
| V1020 | PE 40:4-1 | 2.5741 | 1.3641 | 0.02476 | 1.639666268 | pos | ↑ |
| V1021 | PE 40:5 | 2.9343 | 1.553 | 0.02893 | 1.60883351 | pos | ↑ |
| V1022 | PE 40:6-1 | 3.2038 | 1.6798 | 0.01655 | 1.724954405 | pos | ↑ |
| V1024 | PE 40:8 | 1.682 | 0.75016 | 0.0089085 | 1.830322073 | pos | ↑ |
| V1025 | PE 40:9-1 | 3.3667 | 1.7513 | 0.010424 | 1.805247411 | pos | ↑ |
| V1042 | PE 42:9 | 2.3514 | 1.2335 | 0.028426 | 1.612695781 | pos | ↑ |
| V1077 | PE 48:0 | 0.46281 | -1.1115 | 0.005997 | 1.894807612 | pos | ↓ |
| V1086 | PE O-31:0 | 1.5383 | 0.62132 | 0.02509 | 1.644333689 | pos | ↑ |
| V1087 | PE O-31:1 | 1.8948 | 0.92204 | 0.029509 | 1.608200665 | pos | ↑ |
| V1090 | PE O-32:0 | 1.7985 | 0.84679 | 0.024859 | 1.64351498 | pos | ↑ |
| V1091 | PE O-32:1 | 1.5714 | 0.65206 | 0.047114 | 1.501099831 | pos | ↑ |
| V1093 | PE O-33:0 | 1.8173 | 0.86179 | 0.00020963 | 2.235302525 | pos | ↑ |
| V1094 | PE O-33:1 | 1.9017 | 0.92729 | 0.004305 | 1.943695177 | pos | ↑ |
| V1107 | PE O-34:4 | 0.5659 | -0.82139 | 0.00027587 | 2.220678487 | pos | ↓ |
| V1108 | PE O-35:0 | 2.5383 | 1.3439 | 7.07E-05 | 2.299432608 | pos | ↑ |
| V1117 | PE O-36:2-2 | 1.8917 | 0.91972 | 0.028111 | 1.60844916 | pos | ↑ |
| V1127 | PE O-36:5 | 0.40879 | -1.2906 | 0.04789 | 1.499406507 | pos | ↓ |
| V1131 | PE O-36:6-1 | 0.51729 | -0.95096 | 0.034689 | 1.574780862 | pos | ↓ |
| V1132 | PE O-37:0 | 3.6107 | 1.8523 | 0.0012414 | 2.081703637 | pos | ↑ |
| V1133 | PE O-37:1 | 3.2405 | 1.6962 | 0.021079 | 1.674140735 | pos | ↑ |
| V1158 | PE O-38:6-2 | 0.63496 | -0.65526 | 0.027742 | 1.629587335 | pos | ↓ |
| V1162 | PE O-38:7-2 | 0.64764 | -0.62673 | 0.017512 | 1.712351205 | pos | ↓ |
| V1165 | PE O-39:1 | 2.2753 | 1.186 | 0.0083514 | 1.849236127 | pos | ↑ |
| V317 | PG 32:1 | 1.5055 | 0.59022 | 0.046522 | 1.735367281 | neg | ↑ |
| V346 | PG 36:5 | 1.87 | 0.90301 | 0.003668 | 2.27385001 | neg | ↑ |
| V349 | PG 37:4 | 2.8686 | 1.5203 | 0.031767 | 1.79362682 | neg | ↑ |
| V350 | PG 37:5 | 2.0724 | 1.0513 | 0.03487 | 1.776858332 | neg | ↑ |
| V364 | PG 40:0 | 3.0223 | 1.5957 | 0.0065381 | 2.226243914 | neg | ↑ |
| V373 | PG 41:1 | 0.53909 | -0.8914 | 0.034092 | 1.918513137 | neg | ↓ |
| V376 | PG 41:6 | 1.9375 | 0.95422 | 0.0017797 | 2.355096261 | neg | ↑ |
| V383 | PG 42:6 | 1.6053 | 0.68288 | 0.040128 | 1.736562239 | neg | ↑ |
| V391 | PG 43:6 | 1.5811 | 0.66093 | 0.04328 | 1.770912948 | neg | ↑ |
| V404 | PG 45:3 | 0.59315 | -0.75354 | 0.049529 | 1.697700802 | neg | ↓ |
| V57 | PI 32:0 | 1.6961 | 0.76224 | 0.032447 | 1.810361443 | neg | ↑ |
| V67 | PI 34:0 | 2.4634 | 1.3007 | 0.0056769 | 2.16300542 | neg | ↑ |
| V100 | PI 37:3 | 0.62055 | -0.68838 | 0.025203 | 1.868260811 | neg | ↓ |
| V101 | PI 37:4 | 0.57594 | -0.79602 | 0.028138 | 1.84609653 | neg | ↓ |
| V123 | PI 39:3 | 0.57594 | -0.79602 | 0.013799 | 2.029314514 | neg | ↓ |
| V124 | PI 39:4 | 0.50867 | -0.9752 | 0.0041653 | 2.199945943 | neg | ↓ |
| V129 | PI 40:1-2 | 0.6155 | -0.70018 | 0.019386 | 1.926376897 | neg | ↓ |
| V149 | PI 42:0 | 0.60802 | -0.71781 | 0.028837 | 1.831443246 | neg | ↓ |
| V198 | PS 34:1-1 | 3.4045 | 1.7674 | 0.017316 | 2.035250251 | neg | ↑ |
| V199 | PS 34:1-2 | 2.2392 | 1.163 | 0.014982 | 2.030351982 | neg | ↑ |
| V206 | PS 35:1-2 | 2.6323 | 1.3963 | 0.031935 | 1.915092207 | neg | ↑ |
| V212 | PS 36:1-1 | 2.3889 | 1.2564 | 0.0014757 | 2.371485096 | neg | ↑ |
| V213 | PS 36:1-2 | 2.4366 | 1.2849 | 0.00327 | 2.265257907 | neg | ↑ |
| V217 | PS 36:3-2 | 2.7638 | 1.4667 | 0.025307 | 1.998142296 | neg | ↑ |
| V235 | PS 38:5-1 | 1.6025 | 0.68028 | 0.013901 | 1.985605334 | neg | ↑ |
| V285 | PS 44:6 | 2.0608 | 1.0432 | 0.025461 | 1.95175794 | neg | ↑ |
| V1222 | SM 29:1 | 0.43265 | -1.2087 | 5.38E-05 | 2.314315405 | pos | ↓ |
| V1242 | SM 35:4 | 1.6549 | 0.72675 | 0.018596 | 1.68828496 | pos | ↑ |
| V1244 | SM 36:1-1 | 1.743 | 0.8016 | 0.033126 | 1.573677718 | pos | ↑ |
| V1257 | SM 38:4 | 3.3209 | 1.7316 | 0.009685 | 1.816174188 | pos | ↑ |
| V1258 | SM 38:5 | 23.367 | 4.5464 | 0.00040944 | 2.183332324 | pos | ↑ |
| V1264 | SM 40:0 | 1.6421 | 0.71553 | 0.00019679 | 2.241642926 | pos | ↑ |
| V1270 | SM 40:6 | 4.3421 | 2.1184 | 0.00070962 | 2.138284654 | pos | ↑ |
| V1286 | SM 43:2 | 0.59438 | -0.75054 | 0.018319 | 1.703246915 | pos | ↓ |
| V5 | SM(d18:1/12:0) | 0.33029 | -1.5982 | 0.0099978 | 2.095826543 | neg | ↓ |
| V6 | SM(d18:1/12:0) | 0.27688 | -1.8527 | 0.017471 | 2.120838699 | neg | ↓ |
| V1464 | TG 52:0-1 | 2.6318 | 1.396 | 0.0087664 | 1.836572418 | pos | ↑ |
| V1467 | TG 52:0-2-a | 1.8615 | 0.89647 | 0.031683 | 1.587959073 | pos | ↑ |
| V1468 | TG 52:1-1 | 2.6767 | 1.4205 | 0.018898 | 1.696001887 | pos | ↑ |
| V1469 | TG 52:1-1-a | 2.5587 | 1.3554 | 0.0097599 | 1.816103181 | pos | ↑ |
| V1470 | TG 52:1-2 | 2.2018 | 1.1387 | 0.016849 | 1.717339517 | pos | ↑ |
| V1494 | TG 52:5-6 | 2.586 | 1.3707 | 0.017189 | 1.706439092 | pos | ↑ |
| V1545 | TG 53:5-2 | 2.0814 | 1.0575 | 0.020221 | 1.682086968 | pos | ↑ |
| V1547 | TG 53:5-3-a | 2.2959 | 1.1991 | 0.010358 | 1.807695256 | pos | ↑ |
| V1561 | TG 53:7-2-a | 2.903 | 1.5376 | 0.028572 | 1.611293794 | pos | ↑ |
| V1566 | TG 54:0-1-a | 2.3682 | 1.2438 | 0.0080179 | 1.854957867 | pos | ↑ |
| V1567 | TG 54:0-2 | 2.3766 | 1.2489 | 0.0059439 | 1.899949256 | pos | ↑ |
| V1570 | TG 54:1-1 | 3.6534 | 1.8692 | 0.014754 | 1.748456579 | pos | ↑ |
| V1571 | TG 54:1-1-a | 3.0945 | 1.6297 | 0.029357 | 1.603575523 | pos | ↑ |
| V1572 | TG 54:1-2 | 3.7474 | 1.9059 | 0.011645 | 1.789844587 | pos | ↑ |
| V1575 | TG 54:2-1-a | 2.6919 | 1.4286 | 0.015604 | 1.733495494 | pos | ↑ |
| V1576 | TG 54:2-2 | 2.9284 | 1.5501 | 0.016196 | 1.726443701 | pos | ↑ |
| V1577 | TG 54:2-2-a | 2.6851 | 1.425 | 0.014183 | 1.750134831 | pos | ↑ |
| V1580 | TG 54:3-1 | 1.839 | 0.87894 | 0.018963 | 1.696401495 | pos | ↑ |
| V1584 | TG 54:3-3-a | 1.749 | 0.80656 | 0.031295 | 1.588959765 | pos | ↑ |
| V1592 | TG 54:4-4-a | 2.34 | 1.2265 | 0.0060349 | 1.887814156 | pos | ↑ |
| V1641 | TG 55:2-1 | 2.3719 | 1.246 | 0.042545 | 1.518540035 | pos | ↑ |
| V1642 | TG 55:2-1-a | 2.2474 | 1.1682 | 0.049469 | 1.478438874 | pos | ↑ |
| V1648 | TG 55:3-1-a | 2.1253 | 1.0877 | 0.046715 | 1.493785488 | pos | ↑ |
| V1665 | TG 55:6-1 | 2.6789 | 1.4217 | 0.0072207 | 1.868758611 | pos | ↑ |
| V1697 | TG 56:1-1 | 2.1591 | 1.1104 | 0.041358 | 1.531043744 | pos | ↑ |
| V1705 | TG 56:12-1-a | 0.30339 | -1.7208 | 0.026357 | 1.628822586 | pos | ↓ |
| V1707 | TG 56:1-3 | 2.2039 | 1.14 | 0.035507 | 1.569560666 | pos | ↑ |
| V1708 | TG 56:1-3-a | 2.1519 | 1.1056 | 0.041638 | 1.529059558 | pos | ↑ |
| V1713 | TG 56:2-2 | 2.4114 | 1.2699 | 0.049434 | 1.480642793 | pos | ↑ |
| V1714 | TG 56:2-2-a | 2.5255 | 1.3366 | 0.049577 | 1.47805929 | pos | ↑ |
| V1720 | TG 56:4-1 | 2.6468 | 1.4042 | 0.0013694 | 2.07987489 | pos | ↑ |
| V1722 | TG 56:4-2 | 2.0247 | 1.0177 | 0.043524 | 1.511196948 | pos | ↑ |
| V1727 | TG 56:4-4-a | 1.7696 | 0.82338 | 0.034345 | 1.565042059 | pos | ↑ |
| V1729 | TG 56:4-5-a | 2.3083 | 1.2068 | 0.0082371 | 1.841874194 | pos | ↑ |
| V1731 | TG 56:5-1-a | 1.7385 | 0.79786 | 0.039956 | 1.53250148 | pos | ↑ |
| V1732 | TG 56:5-3 | 1.8887 | 0.91743 | 0.013419 | 1.765981363 | pos | ↑ |
| V1735 | TG 56:5-5 | 1.8273 | 0.86969 | 0.015829 | 1.735657595 | pos | ↑ |
| V1737 | TG 56:5-6-a | 1.855 | 0.89142 | 0.01819 | 1.709597893 | pos | ↑ |
| V1738 | TG 56:6-1-a | 2.0232 | 1.0166 | 0.021931 | 1.664641264 | pos | ↑ |
| V1742 | TG 56:6-4 | 2.0903 | 1.0637 | 0.020119 | 1.684510022 | pos | ↑ |
| V1764 | TG 56:9-4 | 3.007 | 1.5883 | 0.028334 | 1.604406634 | pos | ↑ |
| V1788 | TG 57:7-2-a | 0.59418 | -0.75102 | 0.0030333 | 1.987529568 | pos | ↓ |
| V1791 | TG 57:8-1 | 2.1451 | 1.1011 | 0.048142 | 1.488373359 | pos | ↑ |
| V1792 | TG 57:8-1-a | 0.49786 | -1.0062 | 0.0014645 | 2.062956657 | pos | ↓ |
| V1793 | TG 57:8-2 | 0.46502 | -1.1046 | 0.0035902 | 1.954613896 | pos | ↓ |
| V1794 | TG 57:9-2 | 1.8865 | 0.9157 | 0.0012136 | 2.095445506 | pos | ↑ |
| V1795 | TG 57:9-2-a | 0.43085 | -1.2147 | 0.024373 | 1.635771919 | pos | ↓ |
| V1817 | TG 58:12-1-a | 0.32431 | -1.6246 | 0.0047723 | 1.934837933 | pos | ↓ |
| V1823 | TG 58:13-2 | 0.34576 | -1.5322 | 0.020445 | 1.676491457 | pos | ↓ |
| V1867 | TG 59:10-a | 0.47787 | -1.0653 | 0.033896 | 1.560352241 | pos | ↓ |
| V1869 | TG 59:11-2-a | 0.34642 | -1.5294 | 0.023552 | 1.646005846 | pos | ↓ |
| V1891 | TG 60:12-2 | 0.48682 | -1.0385 | 0.02819 | 1.612572655 | pos | ↓ |
| V1896 | TG 60:13-1-a | 0.3271 | -1.6122 | 0.025714 | 1.630783038 | pos | ↓ |
| V1898 | TG 60:13-3 | 0.29828 | -1.7452 | 0.02631 | 1.625568826 | pos | ↓ |
| V1899 | TG 60:14 | 0.33082 | -1.5959 | 0.03274 | 1.577507181 | pos | ↓ |
| V1928 | TG 61:11-a | 0.43596 | -1.1977 | 0.0052995 | 1.906798647 | pos | ↓ |
| V1929 | TG 61:12-a | 0.36158 | -1.4676 | 0.0016258 | 2.048837247 | pos | ↓ |
| V1933 | TG 61:7 | 0.52359 | -0.93348 | 0.031012 | 1.588171912 | pos | ↓ |
| V1935 | TG 62:10-1 | 0.48904 | -1.032 | 0.011576 | 1.781967616 | pos | ↓ |
| V1946 | TG 62:13-1-a | 0.42872 | -1.2219 | 0.015909 | 1.725629056 | pos | ↓ |
| V1947 | TG 62:13-2 | 0.42073 | -1.249 | 0.014543 | 1.741527535 | pos | ↓ |
| V1949 | TG 62:14 | 0.28159 | -1.8283 | 0.0071535 | 1.86285555 | pos | ↓ |
| V1972 | TG 64:17 | 0.32877 | -1.6049 | 0.017176 | 1.711644338 | pos | ↓ |
| V1980 | TG(e) 54:0 | 1.8644 | 0.8987 | 0.049392 | 1.487972469 | pos | ↑ |
| V1981 | TG(e) 56:1 | 2.5378 | 1.3436 | 0.027413 | 1.630846679 | pos | ↑ |
| V1986 | TG(e)52:1-a | 2.9278 | 1.5498 | 0.0045338 | 1.937872396 | pos | ↑ |
| V1988 | TG(e)54:2 | 1.8252 | 0.86807 | 0.0031861 | 1.971108339 | pos | ↑ |
| V1989 | TG(p) 54:1 | 2.7542 | 1.4616 | 0.042559 | 1.521755483 | pos | ↑ |
| V1991 | TG(p)48:1 | 2.381 | 1.2516 | 0.0097132 | 1.831130658 | pos | ↑ |

**Supplementary Table 7** **Differential metabolites of DAT versus DNC**

| Var ID | Compounds | Fold Change  (FC) | log2(FC) | P | VIP | Ion mode | Trend |
| --- | --- | --- | --- | --- | --- | --- | --- |
| V10 | 11-Deoxycortisol | 0.55727 | -0.84356 | 0.046822 | 1.522217713 | pos | ↓ |
| V691 | 12(13)-EpOME | 6.96E-05 | -13.811 | 0.0058558 | 2.424273966 | neg | ↓ |
| V646 | 12,13-DiHODE | 0.55302 | -0.8546 | 0.016078 | 1.98873702 | neg | ↓ |
| V617 | 16-HETE | 1.6373 | 0.71134 | 0.0016621 | 2.421184526 | neg | ↑ |
| V12 | 21-Deoxycortisol | 0.46482 | -1.1053 | 0.0051694 | 1.952982007 | pos | ↓ |
| V702 | ALA | 1.5162 | 0.60042 | 0.014752 | 2.097514023 | neg | ↑ |
| V592 | Alpha-Tocopherol | 2.8502 | 1.5111 | 0.001993 | 2.370970541 | neg | ↑ |
| V18 | CAR 13:0 | 2.1353 | 1.0944 | 0.015193 | 1.790102506 | pos | ↑ |
| V9 | CAR 16:0 | 1.6299 | 0.70482 | 0.0020237 | 2.103141727 | pos | ↑ |
| V21 | CAR 16:1 | 1.898 | 0.92451 | 0.0041135 | 2.004071069 | pos | ↑ |
| V22 | CAR 16:2 | 1.6828 | 0.7509 | 0.012361 | 1.83814158 | pos | ↑ |
| V25 | CAR 17:0 | 1.7425 | 0.80113 | 0.0054141 | 1.986136557 | pos | ↑ |
| V26 | CAR 18:0 | 1.6954 | 0.76164 | 0.022135 | 1.709589471 | pos | ↑ |
| V27 | CAR 18:1 | 1.7849 | 0.83584 | 0.00062174 | 2.226961333 | pos | ↑ |
| V28 | CAR 18:2 | 1.9323 | 0.95032 | 0.0013859 | 2.137526575 | pos | ↑ |
| V30 | CAR 19:0 | 1.9705 | 0.97853 | 0.036595 | 1.62840643 | pos | ↑ |
| V32 | CAR 20:1 | 2.3468 | 1.2307 | 0.0021916 | 2.093519382 | pos | ↑ |
| V33 | CAR 20:2 | 2.1247 | 1.0872 | 0.00010508 | 2.342700687 | pos | ↑ |
| V37 | CAR 21:0 | 2.4637 | 1.3008 | 0.032219 | 1.648095699 | pos | ↑ |
| V39 | CAR 22:1 | 1.754 | 0.81063 | 0.00093156 | 2.175430166 | pos | ↑ |
| V44 | CAR 23:0 | 2.101 | 1.071 | 0.02001 | 1.75630605 | pos | ↑ |
| V45 | CAR 24:0 | 1.7195 | 0.782 | 0.04448 | 1.554957831 | pos | ↑ |
| V47 | CAR 24:2 | 2.3517 | 1.2337 | 0.036095 | 1.611640389 | pos | ↑ |
| V75 | CE 20:6 | 1.9261 | 0.94566 | 0.0076758 | 1.891508419 | pos | ↑ |
| V83 | CE 24:1 | 2.1619 | 1.1123 | 0.024128 | 1.730290962 | pos | ↑ |
| V110 | Cer 38:2-5 | 1.8572 | 0.89316 | 0.002061 | 2.100028488 | pos | ↑ |
| V114 | Cer 38:3-6 | 1.6606 | 0.7317 | 0.034459 | 1.618501887 | pos | ↑ |
| V127 | Cer 40:1-4 | 2.2338 | 1.1595 | 0.0056746 | 1.932750606 | pos | ↑ |
| V129 | Cer 40:2-1 | 1.6974 | 0.76335 | 0.046481 | 1.522558436 | pos | ↑ |
| V131 | Cer 40:2-4 | 1.849 | 0.88675 | 0.014491 | 1.78222156 | pos | ↑ |
| V136 | Cer 40:4-3 | 2.2654 | 1.1797 | 0.013545 | 1.835802773 | pos | ↑ |
| V138 | Cer 40:5-3 | 2.1342 | 1.0937 | 0.012374 | 1.861130085 | pos | ↑ |
| V139 | Cer 40:5-4 | 1.731 | 0.7916 | 0.0013398 | 2.150066423 | pos | ↑ |
| V142 | Cer 41:1-2 | 2.0325 | 1.0233 | 0.0013539 | 2.120142783 | pos | ↑ |
| V143 | Cer 42:0-2 | 1.9234 | 0.94364 | 0.033558 | 1.595023758 | pos | ↑ |
| V145 | Cer 42:1-3 | 2.2199 | 1.1505 | 0.0053907 | 1.944629551 | pos | ↑ |
| V146 | Cer 42:1-4 | 1.8585 | 0.89411 | 0.0020935 | 2.059780676 | pos | ↑ |
| V147 | Cer 42:2-3 | 2.1414 | 1.0986 | 2.58E-05 | 2.409896599 | pos | ↑ |
| V153 | Cer 43:0-1 | 2.1237 | 1.0866 | 0.037858 | 1.576904086 | pos | ↑ |
| V159 | Cer 44:1-1 | 4.0103 | 2.0037 | 0.014439 | 1.771609425 | pos | ↑ |
| V160 | Cer 44:1-2 | 3.2963 | 1.7209 | 0.007924 | 1.900143626 | pos | ↑ |
| V161 | Cer 44:1-3 | 2.0477 | 1.034 | 0.042791 | 1.543600313 | pos | ↑ |
| V162 | Cer 44:2-2 | 3.2818 | 1.7145 | 0.035263 | 1.58987374 | pos | ↑ |
| V163 | Cer 44:2-3 | 2.326 | 1.2179 | 0.037383 | 1.57104285 | pos | ↑ |
| V166 | CoQ10 | 2.6395 | 1.4002 | 0.0028314 | 2.049632315 | pos | ↑ |
| V167 | corticosterone | 0.44219 | -1.1773 | 0.0042503 | 1.97969498 | pos | ↓ |
| V271 | DG 36:5-6 | 2.4509 | 1.2933 | 0.027317 | 1.677713725 | pos | ↑ |
| V274 | DG 36:6-4 | 2.6401 | 1.4006 | 0.009129 | 1.895224163 | pos | ↑ |
| V311 | DG 38:5-3 | 1.9053 | 0.93005 | 0.034305 | 1.614070074 | pos | ↑ |
| V319 | DG 38:6-4 | 2.7246 | 1.446 | 0.036393 | 1.588406087 | pos | ↑ |
| V320 | DG 38:6-5 | 2.617 | 1.3879 | 0.049099 | 1.525674309 | pos | ↑ |
| V323 | DG 38:7-2 | 2.6639 | 1.4136 | 0.0021436 | 2.093422644 | pos | ↑ |
| V330 | DG 39:1-3 | 2.3793 | 1.2505 | 0.0087021 | 1.872580806 | pos | ↑ |
| V370 | DG 40:8-1 | 2.1496 | 1.104 | 0.03726 | 1.596583605 | pos | ↑ |
| V372 | DG 40:8-4 | 2.5426 | 1.3463 | 0.034374 | 1.619325028 | pos | ↑ |
| V382 | DG 42:11 | 5.7901 | 2.5336 | 0.012054 | 1.825070164 | pos | ↑ |
| V396 | DG 42:8-3 | 1.5573 | 0.63906 | 0.0087182 | 1.867251647 | pos | ↑ |
| V397 | DG 42:9-2 | 2.7791 | 1.4746 | 0.038265 | 1.577626803 | pos | ↑ |
| V422 | DG 48:1-2 | 3.5163 | 1.8141 | 0.0086732 | 1.861340835 | pos | ↑ |
| V703 | DHA | 1.506 | 0.59074 | 0.015666 | 2.081156932 | neg | ↑ |
| V19 | FA(16:2) | 1.5778 | 0.65787 | 0.003839 | 2.292149069 | neg | ↑ |
| V26 | FA(18:3) | 1.5217 | 0.60567 | 0.018239 | 2.013497626 | neg | ↑ |
| V444 | Hex2Cer 34:2-6 | 3.5308 | 1.82 | 0.044318 | 1.557803728 | pos | ↑ |
| V455 | Hex2Cer 36:2-5 | 1.9468 | 0.96112 | 0.043831 | 1.560453675 | pos | ↑ |
| V462 | Hex2Cer 36:6-2 | 6.08 | 2.6041 | 0.0060217 | 1.975122074 | pos | ↑ |
| V465 | Hex2Cer 37:1-2 | 2.0404 | 1.0288 | 0.0081795 | 1.891819421 | pos | ↑ |
| V471 | Hex2Cer 38:2-2 | 1.5855 | 0.66492 | 0.0081605 | 1.894082613 | pos | ↑ |
| V475 | Hex2Cer 38:4-3 | 2.648 | 1.4049 | 0.00060099 | 2.230122426 | pos | ↑ |
| V514 | HexCer 33:1-5 | 1.5844 | 0.66396 | 0.017607 | 1.759742707 | pos | ↑ |
| V515 | HexCer 33:2-3 | 2.3982 | 1.2619 | 0.043141 | 1.556652607 | pos | ↑ |
| V519 | HexCer 34:1-4 | 2.2143 | 1.1469 | 0.036658 | 1.585946278 | pos | ↑ |
| V537 | HexCer 37:3-2 | 2.3459 | 1.2301 | 0.030822 | 1.658382914 | pos | ↑ |
| V540 | HexCer 38:2-2 | 1.7235 | 0.78532 | 0.014597 | 1.821518821 | pos | ↑ |
| V547 | HexCer 38:4-2 | 1.5566 | 0.63838 | 0.011004 | 1.838029593 | pos | ↑ |
| V553 | HexCer 38:5-2 | 1.869 | 0.90224 | 0.011434 | 1.844124619 | pos | ↑ |
| V569 | HexCer 40:5-2 | 1.6007 | 0.67872 | 0.0067182 | 1.934044765 | pos | ↑ |
| V574 | HexCer 40:6-3 | 2.1855 | 1.128 | 0.038502 | 1.568769932 | pos | ↑ |
| V576 | HexCer 40:7-1 | 1.9241 | 0.94416 | 0.005691 | 1.935240841 | pos | ↑ |
| V704 | LA | 1.5319 | 0.61535 | 0.0055667 | 2.218646382 | neg | ↑ |
| V599 | LPC 11:0 | 0.66352 | -0.59178 | 0.0025968 | 2.052838632 | pos | ↓ |
| V2 | LPC 19:0 | 1.5548 | 0.63671 | 0.029849 | 1.677845939 | pos | ↑ |
| V623 | LPC 20:5 | 2.1034 | 1.0727 | 0.0080597 | 1.904929002 | pos | ↑ |
| V639 | LPC O-18:0 | 0.6127 | -0.70676 | 0.022283 | 1.696259814 | pos | ↓ |
| V644 | LPC O-20:1 | 0.56883 | -0.81392 | 0.030392 | 1.623608605 | pos | ↓ |
| V648 | LPE 14:1 | 1.9734 | 0.98071 | 0.0066101 | 1.921690509 | pos | ↑ |
| V1 | LPE 16:0 | 1.5707 | 0.65143 | 0.0050851 | 1.981676072 | pos | ↑ |
| V651 | LPE 16:0-2 | 1.5652 | 0.64635 | 0.0043548 | 1.998829007 | pos | ↑ |
| V654 | LPE 17:0 | 1.6199 | 0.6959 | 0.026014 | 1.681832703 | pos | ↑ |
| V657 | LPE 18:0 | 1.6491 | 0.72171 | 0.005401 | 1.969245372 | pos | ↑ |
| V661 | LPE 19:0 | 1.8918 | 0.91976 | 0.00072451 | 2.212129214 | pos | ↑ |
| V666 | LPE 20:3 | 1.6627 | 0.73351 | 0.011966 | 1.835462833 | pos | ↑ |
| V667 | LPE 20:4 | 1.9767 | 0.98311 | 0.0073384 | 1.919477808 | pos | ↑ |
| V668 | LPE 20:5 | 2.4167 | 1.273 | 1.65E-05 | 2.439738877 | pos | ↑ |
| V669 | LPE 21:0 | 1.569 | 0.64985 | 0.014431 | 1.807077843 | pos | ↑ |
| V675 | LPE 22:5 | 1.7176 | 0.78039 | 0.016713 | 1.767661926 | pos | ↑ |
| V676 | LPE 22:6 | 2.3922 | 1.2583 | 0.0052337 | 1.971128283 | pos | ↑ |
| V680 | LPE O-18:3 | 1.7358 | 0.79563 | 0.011392 | 1.840283032 | pos | ↑ |
| V447 | PA(16:0_20:0)-H | 2.0904 | 1.0638 | 0.011688 | 2.113100174 | neg | ↑ |
| V456 | PA(16:1_18:0)-H | 0.52767 | -0.92231 | 0.021508 | 1.954867387 | neg | ↓ |
| V469 | PA(17:0_20:1)-H | 1.5498 | 0.63208 | 0.010859 | 2.067806548 | neg | ↑ |
| V481 | PA(18:0_20:1)-H | 2.2628 | 1.1781 | 0.024058 | 2.025963557 | neg | ↑ |
| V485 | PA(18:0_20:5)-H | 1.6859 | 0.75351 | 0.008907 | 2.20983672 | neg | ↑ |
| V514 | PA(18:3_20:2)-H | 0.49096 | -1.0263 | 0.02673 | 1.867523754 | neg | ↓ |
| V537 | PA(20:0_22:6)-H | 1.6351 | 0.70941 | 0.017197 | 2.006256039 | neg | ↑ |
| V701 | PC 29:2 | 2.342 | 1.2277 | 0.020221 | 1.736552175 | pos | ↑ |
| V720 | PC 32:5 | 1.7204 | 0.78272 | 0.030619 | 1.613415026 | pos | ↑ |
| V736 | PC 35:0-1 | 1.6938 | 0.76024 | 0.001519 | 2.1437169 | pos | ↑ |
| V738 | PC 35:2 | 1.6817 | 0.74995 | 0.048045 | 1.53337822 | pos | ↑ |
| V743 | PC 36:0 | 1.5998 | 0.67787 | 0.0052989 | 1.97167156 | pos | ↑ |
| V753 | PC 37:1-1 | 1.9512 | 0.9644 | 0.010881 | 1.855520022 | pos | ↑ |
| V754 | PC 37:2-1 | 1.738 | 0.79745 | 0.029107 | 1.651838113 | pos | ↑ |
| V760 | PC 38:1-1 | 1.7116 | 0.77536 | 0.017923 | 1.786157922 | pos | ↑ |
| V767 | PC 38:8 | 2.0732 | 1.0519 | 0.019286 | 1.750493033 | pos | ↑ |
| V772 | PC 39:3 | 1.5184 | 0.60256 | 0.042522 | 1.568430225 | pos | ↑ |
| V773 | PC 39:4-1 | 1.5199 | 0.60398 | 0.047381 | 1.543001605 | pos | ↑ |
| V794 | PC 41:6 | 1.5874 | 0.66665 | 0.011202 | 1.855705421 | pos | ↑ |
| V804 | PC 42:6 | 1.744 | 0.80243 | 0.015957 | 1.77288055 | pos | ↑ |
| V814 | PC 43:6 | 0.51051 | -0.97 | 0.0021134 | 2.067880258 | pos | ↓ |
| V841 | PC 46:6 | 1.9026 | 0.92795 | 0.034704 | 1.626432231 | pos | ↑ |
| V842 | PC 46:7 | 1.9527 | 0.9655 | 0.035418 | 1.625042458 | pos | ↑ |
| V844 | PC 47:3 | 1.9383 | 0.95477 | 0.032435 | 1.627475726 | pos | ↑ |
| V847 | PC 47:6 | 2.3105 | 1.2082 | 0.022325 | 1.701440348 | pos | ↑ |
| V854 | PC 48:6 | 2.1943 | 1.1338 | 0.024937 | 1.701941903 | pos | ↑ |
| V861 | PC O-28:1 | 1.7095 | 0.77356 | 0.021755 | 1.707756524 | pos | ↑ |
| V865 | PC O-29:1 | 1.7438 | 0.80223 | 0.011133 | 1.84104195 | pos | ↑ |
| V868 | PC O-30:1-1 | 1.5664 | 0.64748 | 0.013759 | 1.804828242 | pos | ↑ |
| V869 | PC O-30:2 | 1.8851 | 0.91462 | 0.03758 | 1.59580707 | pos | ↑ |
| V871 | PC O-31:0 | 1.6873 | 0.75472 | 0.02883 | 1.651321273 | pos | ↑ |
| V889 | PC O-34:5-1 | 1.53 | 0.61351 | 0.038834 | 1.594477323 | pos | ↑ |
| V901 | PC O-36:5-1 | 1.5669 | 0.64791 | 0.010558 | 1.852923495 | pos | ↑ |
| V902 | PC O-36:6-1 | 1.9089 | 0.93276 | 0.0052858 | 1.956088192 | pos | ↑ |
| V903 | PC O-36:7 | 1.7816 | 0.83318 | 0.03039 | 1.63905372 | pos | ↑ |
| V910 | PC O-38:2-1 | 1.8844 | 0.91412 | 0.021472 | 1.728479519 | pos | ↑ |
| V915 | PC O-38:7 | 3.0898 | 1.6275 | 0.0054896 | 1.953029643 | pos | ↑ |
| V921 | PC O-40:4-1 | 1.5601 | 0.64161 | 0.029187 | 1.662014061 | pos | ↑ |
| V932 | PC O-42:5-1 | 1.6715 | 0.74111 | 0.029293 | 1.658028125 | pos | ↑ |
| V933 | PC O-42:6-1 | 1.6031 | 0.68086 | 0.0083462 | 1.910351916 | pos | ↑ |
| V949 | PE 27:2 | 2.0345 | 1.0247 | 0.0013423 | 2.136397742 | pos | ↑ |
| V957 | PE 31:0 | 1.8516 | 0.88879 | 0.030643 | 1.635731038 | pos | ↑ |
| V968 | PE 33:3 | 2.7535 | 1.4613 | 0.0024992 | 2.06870426 | pos | ↑ |
| V973 | PE 34:5 | 2.2124 | 1.1456 | 0.010908 | 1.841228249 | pos | ↑ |
| V974 | PE 34:6 | 1.6236 | 0.69922 | 0.031764 | 1.647816367 | pos | ↑ |
| V986 | PE 36:4 | 2.3402 | 1.2266 | 0.025244 | 1.685750383 | pos | ↑ |
| V1005 | PE 38:6 | 4.2782 | 2.097 | 0.0052311 | 1.968068903 | pos | ↑ |
| V1006 | PE 38:7-1 | 2.1736 | 1.1201 | 0.023613 | 1.70093986 | pos | ↑ |
| V1021 | PE 40:5 | 3.1456 | 1.6533 | 0.019951 | 1.729702868 | pos | ↑ |
| V1022 | PE 40:6-1 | 3.7971 | 1.9249 | 0.011586 | 1.83841608 | pos | ↑ |
| V1024 | PE 40:8 | 2.0051 | 1.0037 | 0.004571 | 1.997467774 | pos | ↑ |
| V1025 | PE 40:9-1 | 3.9407 | 1.9784 | 0.0070156 | 1.923698148 | pos | ↑ |
| V1037 | PE 42:4 | 0.64711 | -0.62792 | 0.014941 | 1.781593256 | pos | ↓ |
| V1039 | PE 42:6 | 2.6785 | 1.4214 | 0.024205 | 1.687663615 | pos | ↑ |
| V1040 | PE 42:7 | 2.4752 | 1.3076 | 0.023017 | 1.715619966 | pos | ↑ |
| V1042 | PE 42:9 | 2.8659 | 1.519 | 0.010536 | 1.866302665 | pos | ↑ |
| V1048 | PE 44:0 | 2.4109 | 1.2696 | 0.039008 | 1.57685427 | pos | ↑ |
| V1051 | PE 44:12 | 3.1545 | 1.6574 | 0.043407 | 1.55415623 | pos | ↑ |
| V1058 | PE 45:0 | 1.7245 | 0.78615 | 0.044314 | 1.543352906 | pos | ↑ |
| V1083 | PE 48:7 | 0.65676 | -0.60657 | 0.022312 | 1.709624309 | pos | ↓ |
| V1085 | PE O-27:0 | 3.4417 | 1.7831 | 0.04197 | 1.551079873 | pos | ↑ |
| V1091 | PE O-32:1 | 2.4139 | 1.2714 | 0.0031585 | 2.061275873 | pos | ↑ |
| V1093 | PE O-33:0 | 1.5657 | 0.64684 | 0.018053 | 1.753643235 | pos | ↑ |
| V1094 | PE O-33:1 | 1.7226 | 0.7846 | 0.016639 | 1.76815728 | pos | ↑ |
| V1102 | PE O-34:2 | 1.8805 | 0.91112 | 0.020639 | 1.731606134 | pos | ↑ |
| V1103 | PE O-34:2-1 | 1.7421 | 0.80083 | 0.0097649 | 1.856407396 | pos | ↑ |
| V1105 | PE O-34:3 | 3.2569 | 1.7035 | 0.0030399 | 2.02388404 | pos | ↑ |
| V1127 | PE O-36:5 | 1.6435 | 0.71677 | 0.029375 | 1.632750199 | pos | ↑ |
| V1132 | PE O-37:0 | 2.3309 | 1.2209 | 0.012683 | 1.815166649 | pos | ↑ |
| V1156 | PE O-38:6 | 2.1736 | 1.1201 | 0.01853 | 1.757544013 | pos | ↑ |
| V1157 | PE O-38:6-1 | 1.553 | 0.63503 | 0.018598 | 1.756737451 | pos | ↑ |
| V1161 | PE O-38:7-1 | 1.8345 | 0.87539 | 0.008959 | 1.891101916 | pos | ↑ |
| V1188 | PE O-40:7-2 | 1.6823 | 0.75046 | 0.038022 | 1.590201065 | pos | ↑ |
| V1191 | PE O-40:7-8 | 1.7165 | 0.77949 | 0.0088133 | 1.880710623 | pos | ↑ |
| V1192 | PE O-40:8-1 | 1.9014 | 0.92708 | 0.0099559 | 1.865806072 | pos | ↑ |
| V1194 | PE O-40:9 | 2.1424 | 1.0992 | 0.020684 | 1.714826311 | pos | ↑ |
| V1205 | PE O-42:6-2 | 1.6352 | 0.70948 | 0.026325 | 1.68951123 | pos | ↑ |
| V328 | PG 34:1 | 1.5415 | 0.62433 | 0.023005 | 1.987661828 | neg | ↑ |
| V350 | PG 37:5 | 1.7847 | 0.83572 | 0.043184 | 1.838693018 | neg | ↑ |
| V377 | PG 41:7 | 1.9843 | 0.9886 | 0.02376 | 2.036818752 | neg | ↑ |
| V383 | PG 42:6 | 2.3554 | 1.236 | 0.0049534 | 2.215621114 | neg | ↑ |
| V384 | PG 42:7 | 1.5829 | 0.66253 | 0.043462 | 1.742185509 | neg | ↑ |
| V388 | PG 43:0 | 0.52817 | -0.92094 | 0.02833 | 1.867005969 | neg | ↓ |
| V638 | PGD2 | 0.50557 | -0.98401 | 0.011635 | 2.080528603 | neg | ↓ |
| V635 | PGE2 | 0.48475 | -1.0447 | 0.0049014 | 2.307015114 | neg | ↓ |
| V621 | PGF2\PGD2 | 0.42778 | -1.2251 | 0.026577 | 1.906497983 | neg | ↓ |
| V57 | PI 32:0 | 1.877 | 0.9084 | 0.015415 | 2.090794256 | neg | ↑ |
| V58 | PI 32:1 | 3.1699 | 1.6644 | 0.033229 | 1.975221325 | neg | ↑ |
| V72 | PI 34:3 | 1.8688 | 0.90211 | 0.032192 | 1.887265749 | neg | ↑ |
| V79 | PI 35:4 | 0.63237 | -0.66115 | 0.033292 | 1.915122344 | neg | ↓ |
| V104 | PI 38:0 | 1.5888 | 0.66795 | 0.0052247 | 2.337269023 | neg | ↑ |
| V114 | PI 38:6-1 | 1.6681 | 0.73821 | 0.022128 | 1.991897996 | neg | ↑ |
| V115 | PI 38:6-2 | 1.5871 | 0.6664 | 0.026885 | 1.901826131 | neg | ↑ |
| V119 | PI 38:9 | 0.66076 | -0.59781 | 0.027697 | 1.857575005 | neg | ↓ |
| V126 | PI 39:6-1 | 2.3086 | 1.207 | 0.007647 | 2.35272653 | neg | ↑ |
| V127 | PI 39:6-2 | 1.6294 | 0.70434 | 0.038692 | 1.81604186 | neg | ↑ |
| V137 | PI 40:6-1 | 1.5744 | 0.65478 | 0.019492 | 1.949131993 | neg | ↑ |
| V148 | PI 41:6 | 2.7385 | 1.4534 | 0.034766 | 1.94738102 | neg | ↑ |
| V154 | PI 42:6 | 1.8876 | 0.91656 | 0.039656 | 1.762655493 | neg | ↑ |
| V166 | PI 44:1 | 0.54964 | -0.86343 | 0.027805 | 1.87779358 | neg | ↓ |
| V174 | PI 44:9 | 1.8556 | 0.89188 | 0.013757 | 2.022061904 | neg | ↑ |
| V188 | PI 46:4 | 0.52463 | -0.93061 | 0.010656 | 2.087176101 | neg | ↓ |
| V212 | PS 36:1-1 | 1.6477 | 0.72047 | 0.015736 | 2.002777537 | neg | ↑ |
| V639 | Resolvin D2 | 1.7461 | 0.80413 | 0.0020573 | 2.336688696 | neg | ↑ |
| V1227 | SM 32:0 | 1.6 | 0.67805 | 0.026057 | 1.683259349 | pos | ↑ |
| V1228 | SM 32:1 | 1.6775 | 0.74631 | 0.018551 | 1.748165465 | pos | ↑ |
| V1232 | SM 33:1 | 1.5346 | 0.61789 | 0.025655 | 1.684707163 | pos | ↑ |
| V1233 | SM 33:2 | 2.0078 | 1.0056 | 0.034164 | 1.620860347 | pos | ↑ |
| V1242 | SM 35:4 | 1.5872 | 0.66651 | 0.015284 | 1.776122189 | pos | ↑ |
| V1247 | SM 36:4 | 2.1515 | 1.1053 | 0.047535 | 1.518307383 | pos | ↑ |
| V1560 | TG 53:7-2 | 1.5069 | 0.59157 | 0.0040873 | 1.99646674 | pos | ↑ |
| V1564 | TG 53:8-a | 1.6787 | 0.74734 | 0.0041448 | 1.994187297 | pos | ↑ |
| V1569 | TG 54:10-2-a | 2.0194 | 1.014 | 0.0076491 | 1.889229746 | pos | ↑ |
| V1606 | TG 54:6-3 | 1.6269 | 0.70209 | 0.021805 | 1.706606987 | pos | ↑ |
| V1613 | TG 54:7-2 | 2.5343 | 1.3416 | 0.0058629 | 1.950240381 | pos | ↑ |
| V1616 | TG 54:7-3-a | 2.2153 | 1.1475 | 0.037909 | 1.581790159 | pos | ↑ |
| V1629 | TG 54:9-1 | 2.7022 | 1.4341 | 0.0036593 | 2.014841456 | pos | ↑ |
| V1668 | TG 55:6-2-a | 1.6994 | 0.76503 | 0.0025924 | 2.080741632 | pos | ↑ |
| V1679 | TG 55:7-4-a | 1.7174 | 0.78018 | 0.0043921 | 1.992163511 | pos | ↑ |
| V1693 | TG 56:10-1-a | 2.9452 | 1.5584 | 0.0015511 | 2.110565639 | pos | ↑ |
| V1695 | TG 56:10-2-a | 2.9637 | 1.5674 | 0.029824 | 1.630153468 | pos | ↑ |
| V1696 | TG 56:10-3 | 2.7274 | 1.4475 | 0.011797 | 1.815737797 | pos | ↑ |
| V1699 | TG 56:11-2 | 3.4566 | 1.7893 | 0.0041635 | 2.002339349 | pos | ↑ |
| V1701 | TG 56:11-3 | 2.2301 | 1.1571 | 0.022299 | 1.700920082 | pos | ↑ |
| V1720 | TG 56:4-1 | 1.5614 | 0.6428 | 0.030223 | 1.634658128 | pos | ↑ |
| V1732 | TG 56:5-3 | 1.5932 | 0.67197 | 0.023008 | 1.695552471 | pos | ↑ |
| V1735 | TG 56:5-5 | 1.5623 | 0.6437 | 0.031293 | 1.6237967 | pos | ↑ |
| V1737 | TG 56:5-6-a | 1.599 | 0.67716 | 0.028052 | 1.654554225 | pos | ↑ |
| V1750 | TG 56:7-3 | 1.5684 | 0.64929 | 0.048121 | 1.507279075 | pos | ↑ |
| V1751 | TG 56:7-4 | 1.8734 | 0.90567 | 0.042689 | 1.551861203 | pos | ↑ |
| V1753 | TG 56:7-6 | 1.6392 | 0.71297 | 0.01328 | 1.810463965 | pos | ↑ |
| V1756 | TG 56:8-2 | 1.8364 | 0.8769 | 0.013523 | 1.803802469 | pos | ↑ |
| V1758 | TG 56:8-4 | 1.5938 | 0.67244 | 0.022138 | 1.704828058 | pos | ↑ |
| V1759 | TG 56:8-5 | 2.3917 | 1.258 | 0.042869 | 1.540682409 | pos | ↑ |
| V1762 | TG 56:9-2 | 3.3902 | 1.7614 | 0.0043023 | 1.989023143 | pos | ↑ |
| V1764 | TG 56:9-4 | 2.3943 | 1.2596 | 0.044121 | 1.532973428 | pos | ↑ |
| V1768 | TG 57:10-1-a | 2.7225 | 1.4449 | 0.0034794 | 2.022095513 | pos | ↑ |
| V1794 | TG 57:9-2 | 1.5237 | 0.60756 | 0.008391 | 1.876914241 | pos | ↑ |
| V1799 | TG 58:10-1 | 2.3516 | 1.2336 | 0.035026 | 1.602223704 | pos | ↑ |
| V1800 | TG 58:10-1-a | 2.4894 | 1.3158 | 0.028394 | 1.654542969 | pos | ↑ |
| V1801 | TG 58:10-2 | 2.6363 | 1.3985 | 0.044197 | 1.539821737 | pos | ↑ |
| V1805 | TG 58:10-5 | 2.4723 | 1.3059 | 0.047471 | 1.517443711 | pos | ↑ |
| V1806 | TG 58:10-5-a | 2.579 | 1.3668 | 0.028129 | 1.654609604 | pos | ↑ |
| V1808 | TG 58:10-7 | 2.4795 | 1.31 | 0.021857 | 1.701904089 | pos | ↑ |
| V1810 | TG 58:11-1 | 2.3418 | 1.2276 | 0.049572 | 1.520210641 | pos | ↑ |
| V1812 | TG 58:11-3 | 3.1066 | 1.6353 | 0.017735 | 1.747919918 | pos | ↑ |
| V1818 | TG 58:12-2-a | 3.2678 | 1.7083 | 0.0013554 | 2.134611545 | pos | ↑ |
| V1819 | TG 58:12-3 | 3.6359 | 1.8623 | 0.026387 | 1.652108029 | pos | ↑ |
| V1820 | TG 58:12-3-a | 2.3726 | 1.2465 | 0.0058673 | 1.946528215 | pos | ↑ |
| V1860 | TG 58:9-1-a | 1.6326 | 0.70714 | 0.046424 | 1.526104719 | pos | ↑ |
| V1867 | TG 59:10-a | 2.0494 | 1.0352 | 0.014216 | 1.804997112 | pos | ↑ |
| V1868 | TG 59:11-1-a | 2.2587 | 1.1755 | 0.008972 | 1.892556709 | pos | ↑ |
| V1869 | TG 59:11-2-a | 2.387 | 1.2552 | 0.037828 | 1.584406702 | pos | ↑ |
| V1878 | TG 59:7-2 | 1.758 | 0.81395 | 0.009327 | 1.891580933 | pos | ↑ |
| V1890 | TG 60:12-1 | 1.9905 | 0.99316 | 0.0194 | 1.752019329 | pos | ↑ |
| V1892 | TG 60:12-3 | 2.9935 | 1.5819 | 0.024653 | 1.67642221 | pos | ↑ |
| V1893 | TG 60:12-3-a | 3.2906 | 1.7183 | 0.036556 | 1.591454279 | pos | ↑ |
| V1894 | TG 60:12-4 | 3.0298 | 1.5992 | 0.049208 | 1.505031018 | pos | ↑ |
| V1895 | TG 60:12-4-a | 2.9316 | 1.5517 | 0.021484 | 1.706533947 | pos | ↑ |
| V1896 | TG 60:13-1-a | 3.4551 | 1.7887 | 0.0037142 | 2.002649942 | pos | ↑ |
| V1898 | TG 60:13-3 | 3.4571 | 1.7896 | 0.0051486 | 1.963590071 | pos | ↑ |
| V1899 | TG 60:14 | 2.6921 | 1.4287 | 0.023624 | 1.668533032 | pos | ↑ |
| V1929 | TG 61:12-a | 2.0545 | 1.0388 | 0.0014515 | 2.156770414 | pos | ↑ |
| V1933 | TG 61:7 | 0.60127 | -0.73392 | 0.044512 | 1.533884922 | pos | ↓ |
| V1935 | TG 62:10-1 | 1.7576 | 0.81363 | 0.025667 | 1.686163948 | pos | ↑ |
| V1946 | TG 62:13-1-a | 2.2363 | 1.1611 | 0.028146 | 1.650998445 | pos | ↑ |
| V1947 | TG 62:13-2 | 2.3561 | 1.2364 | 0.034841 | 1.599746896 | pos | ↑ |
| V1949 | TG 62:14 | 2.7903 | 1.4804 | 0.012423 | 1.824501246 | pos | ↑ |
| V1950 | TG 62:15 | 2.7077 | 1.4371 | 0.026035 | 1.657869201 | pos | ↑ |
| V1969 | TG 64:13-a | 2.3028 | 1.2034 | 0.049674 | 1.504701798 | pos | ↑ |
| V1979 | TG 64:7-2 | 3.0096 | 1.5896 | 0.04064 | 1.597423848 | pos | ↑ |

**Supplementary Table 8** **Differential metabolites of DNC versus RNC**

| Var ID | Compounds | Fold Change  (FC) | log2(FC) | P | VIP | Ion mode | Trend |
| --- | --- | --- | --- | --- | --- | --- | --- |
| V670 | 9-HEPE | 0.66418 | -0.59035 | 0.031958 | 1.858032335 | neg | ↓ |
| V701 | 9-Nitrooleate | 0.63265 | -0.66052 | 0.021715 | 2.066054185 | neg | ↓ |
| V14 | Androstenedione | 0.49388 | -1.0178 | 0.0033774 | 2.020793998 | pos | ↓ |
| V23 | CAR 16:3 | 3.8118 | 1.9305 | 0.00018667 | 2.295391194 | pos | ↑ |
| V24 | CAR 16:4 | 3.172 | 1.6654 | 0.0024834 | 2.057186095 | pos | ↑ |
| V38 | CAR 22:0 | 1.7329 | 0.79322 | 0.021743 | 1.698943853 | pos | ↑ |
| V52 | CAR 8-HEPE | 0.61345 | -0.70497 | 0.014855 | 1.783812981 | pos | ↓ |
| V57 | CE 15:0 | 0.58683 | -0.76897 | 0.034288 | 1.610200137 | pos | ↓ |
| V66 | CE 18:2 | 0.62861 | -0.66976 | 0.036959 | 1.592438658 | pos | ↓ |
| V75 | CE 20:6 | 0.48079 | -1.0565 | 0.0013894 | 2.138124617 | pos | ↓ |
| V83 | CE 24:1 | 0.43969 | -1.1855 | 0.02944 | 1.650181574 | pos | ↓ |
| V89 | Cer 32:2-3 | 0.20487 | -2.2872 | 0.036633 | 1.586327821 | pos | ↓ |
| V95 | Cer 34:3-4 | 0.55402 | -0.85199 | 0.0080618 | 1.886656575 | pos | ↓ |
| V98 | Cer 36:0-2 | 2.3194 | 1.2137 | 0.046562 | 1.530589819 | pos | ↑ |
| V100 | Cer 36:1-3 | 1.9227 | 0.94315 | 0.035309 | 1.607888668 | pos | ↑ |
| V106 | Cer 38:0-2 | 2.0628 | 1.0446 | 0.028597 | 1.646190525 | pos | ↑ |
| V126 | Cer 40:1-3 | 1.659 | 0.7303 | 0.035134 | 1.602487617 | pos | ↑ |
| V128 | Cer 40:1-5 | 0.46524 | -1.104 | 0.021399 | 1.717526853 | pos | ↓ |
| V132 | Cer 40:2-5 | 1.5253 | 0.60909 | 0.014844 | 1.791736332 | pos | ↑ |
| V591 | CL(72:8_20:4)-2H | 10.857 | 3.4406 | 0.00054969 | 2.672860507 | neg | ↑ |
| V166 | CoQ10 | 0.6093 | -0.71478 | 0.002769 | 2.062281033 | pos | ↓ |
| V219 | DG 34:2-7 | 0.47414 | -1.0766 | 0.0024731 | 2.057369353 | pos | ↓ |
| V379 | DG 41:2-1 | 0.22176 | -2.173 | 0.0043585 | 1.993259768 | pos | ↓ |
| V391 | DG 42:6-1 | 0.6285 | -0.67001 | 0.01612 | 1.770677829 | pos | ↓ |
| V596 | dienestrol | 1.5356 | 0.61877 | 0.0011178 | 2.45119946 | neg | ↑ |
| V35 | FA(20:5) | 0.37557 | -1.4128 | 0.021732 | 1.998689969 | neg | ↓ |
| V433 | Hex2Cer 30:1-1 | 0.50401 | -0.98846 | 0.020478 | 1.729388903 | pos | ↓ |
| V459 | Hex2Cer 36:4-2 | 0.48829 | -1.0342 | 0.042673 | 1.561181979 | pos | ↓ |
| V463 | Hex2Cer 37:0-2 | 0.41535 | -1.2676 | 0.020507 | 1.713110909 | pos | ↓ |
| V465 | Hex2Cer 37:1-2 | 0.37756 | -1.4052 | 0.010948 | 1.845594468 | pos | ↓ |
| V470 | Hex2Cer 38:1-4 | 0.46487 | -1.1051 | 0.022541 | 1.696854525 | pos | ↓ |
| V494 | Hex2Cer 42:2-4 | 0.31152 | -1.6826 | 0.021453 | 1.707091847 | pos | ↓ |
| V495 | Hex2Cer 42:3-1 | 0.28422 | -1.8149 | 0.026062 | 1.680579434 | pos | ↓ |
| V496 | Hex2Cer 42:3-2 | 0.26576 | -1.9118 | 0.018042 | 1.756387015 | pos | ↓ |
| V497 | Hex2Cer 42:3-3 | 0.13834 | -2.8537 | 0.03606 | 1.60894176 | pos | ↓ |
| V499 | Hex2Cer 42:4-2 | 0.52287 | -0.93547 | 0.032684 | 1.628060005 | pos | ↓ |
| V524 | HexCer 35:2-3 | 2.7527 | 1.4609 | 0.033668 | 1.612743188 | pos | ↑ |
| V532 | HexCer 36:4-2 | 0.60984 | -0.7135 | 0.039731 | 1.558470033 | pos | ↓ |
| V534 | HexCer 36:5-3 | 0.45284 | -1.1429 | 0.02332 | 1.698436248 | pos | ↓ |
| V547 | HexCer 38:4-2 | 0.6277 | -0.67184 | 0.0053021 | 1.95062429 | pos | ↓ |
| V553 | HexCer 38:5-2 | 0.64074 | -0.64219 | 0.0084715 | 1.884384743 | pos | ↓ |
| V555 | HexCer 38:6-3 | 0.41953 | -1.2532 | 0.016032 | 1.768442897 | pos | ↓ |
| V571 | HexCer 40:5-4 | 2.0232 | 1.0166 | 0.0080965 | 1.902311404 | pos | ↑ |
| V572 | HexCer 40:5-5 | 0.55123 | -0.85929 | 0.045327 | 1.530315632 | pos | ↓ |
| V574 | HexCer 40:6-3 | 0.60125 | -0.73396 | 0.010795 | 1.846884624 | pos | ↓ |
| V601 | LPC 13:0 | 0.56958 | -0.81203 | 0.039808 | 1.567068933 | pos | ↓ |
| V609 | LPC 17:0 | 0.56057 | -0.83503 | 0.00041009 | 2.242808909 | pos | ↓ |
| V611 | LPC 17:2 | 0.64296 | -0.63719 | 0.0097499 | 1.859935076 | pos | ↓ |
| V616 | LPC 18:4-1 | 1.7671 | 0.82141 | 0.00034297 | 2.250446757 | pos | ↑ |
| V2 | LPC 19:0 | 0.4547 | -1.137 | 0.0074727 | 1.915223853 | pos | ↓ |
| V620 | LPC 20:2 | 0.56853 | -0.8147 | 3.90E-05 | 2.39152621 | pos | ↓ |
| V623 | LPC 20:5 | 0.42113 | -1.2477 | 0.0051203 | 1.962306918 | pos | ↓ |
| V639 | LPC O-18:0 | 1.9226 | 0.94307 | 0.0073324 | 1.908848719 | pos | ↑ |
| V2 | LPC(19:0) | 0.57977 | -0.78645 | 0.005518 | 2.354779963 | neg | ↓ |
| V3 | LPC(19:0) | 0.55203 | -0.85718 | 0.0068786 | 2.24738322 | neg | ↓ |
| V654 | LPE 17:0 | 0.64699 | -0.62819 | 0.00087912 | 2.170647226 | pos | ↓ |
| V661 | LPE 19:0 | 0.58033 | -0.78505 | 0.0042328 | 1.998383749 | pos | ↓ |
| V668 | LPE 20:5 | 0.46008 | -1.12 | 0.00088568 | 2.176017825 | pos | ↓ |
| V677 | LPE 23:0 | 0.53243 | -0.90934 | 0.031888 | 1.625250574 | pos | ↓ |
| V439 | PA(15:0_22:6)-H | 0.59292 | -0.75409 | 0.040429 | 1.772351198 | neg | ↓ |
| V447 | PA(16:0_20:0)-H | 0.57923 | -0.78779 | 0.013071 | 2.024248663 | neg | ↓ |
| V449 | PA(16:0_20:2)-H | 1.5637 | 0.645 | 0.049575 | 1.716400247 | neg | ↑ |
| V454 | PA(16:1_16:1)-H | 1.9061 | 0.93063 | 0.046116 | 1.727751724 | neg | ↑ |
| V463 | PA(17:0_17:0)-H | 0.58759 | -0.76711 | 0.033292 | 1.888584025 | neg | ↓ |
| V465 | PA(17:0_18:2)-H | 0.4685 | -1.0939 | 0.049561 | 1.765355299 | neg | ↓ |
| V472 | PA(17:0_20:4)-H | 0.64953 | -0.62253 | 0.043525 | 1.783836365 | neg | ↓ |
| V485 | PA(18:0_20:5)-H | 0.54029 | -0.8882 | 0.0030014 | 2.392197601 | neg | ↓ |
| V488 | PA(18:1_18:1)-H | 2.1773 | 1.1226 | 0.019533 | 1.992820338 | neg | ↑ |
| V527 | PA(19:0_22:5)-H | 0.53199 | -0.91052 | 0.049435 | 1.715859062 | neg | ↓ |
| V528 | PA(19:0_22:6)-H | 1.5736 | 0.65403 | 0.031077 | 1.835025237 | neg | ↑ |
| V542 | PA(20:1_20:5)-H | 0.40602 | -1.3004 | 0.0049998 | 2.277697499 | neg | ↓ |
| V692 | PC 25:0 | 0.43593 | -1.1978 | 0.013293 | 1.816746897 | pos | ↓ |
| V701 | PC 29:2 | 0.32572 | -1.6183 | 0.035632 | 1.60460346 | pos | ↓ |
| V711 | PC 31:2 | 0.41122 | -1.282 | 0.016096 | 1.767956262 | pos | ↓ |
| V713 | PC 31:4 | 0.5271 | -0.92386 | 0.024915 | 1.68141166 | pos | ↓ |
| V719 | PC 32:4 | 2.9187 | 1.5453 | 0.0014406 | 2.115222085 | pos | ↑ |
| V734 | PC 34:5 | 2.3231 | 1.2161 | 0.014708 | 1.783111171 | pos | ↑ |
| V735 | PC 34:6 | 2.8322 | 1.5019 | 0.0070086 | 1.906796501 | pos | ↑ |
| V736 | PC 35:0-1 | 0.59055 | -0.75988 | 0.0090026 | 1.875272733 | pos | ↓ |
| V738 | PC 35:2 | 0.4554 | -1.1348 | 0.015037 | 1.780690047 | pos | ↓ |
| V739 | PC 35:3 | 0.57191 | -0.80614 | 0.028191 | 1.652449092 | pos | ↓ |
| V740 | PC 35:4 | 0.58221 | -0.7804 | 0.010107 | 1.858482513 | pos | ↓ |
| V750 | PC 36:7 | 5.0942 | 2.3489 | 2.48E-07 | 2.540799302 | pos | ↑ |
| V753 | PC 37:1-1 | 0.37056 | -1.4322 | 0.0035104 | 2.019746254 | pos | ↓ |
| V754 | PC 37:2-1 | 0.41882 | -1.2556 | 0.0042815 | 1.989949306 | pos | ↓ |
| V755 | PC 37:3-1 | 0.44463 | -1.1693 | 0.00070422 | 2.191669361 | pos | ↓ |
| V757 | PC 37:5 | 0.6133 | -0.70533 | 0.01168 | 1.827032089 | pos | ↓ |
| V758 | PC 37:6 | 0.64187 | -0.63964 | 0.045106 | 1.546813956 | pos | ↓ |
| V759 | PC 37:7 | 0.46965 | -1.0903 | 0.018413 | 1.739753071 | pos | ↓ |
| V767 | PC 38:8 | 0.59446 | -0.75035 | 0.010879 | 1.854715838 | pos | ↓ |
| V770 | PC 39:1-1 | 0.61261 | -0.70696 | 0.017148 | 1.772569124 | pos | ↓ |
| V771 | PC 39:2 | 0.56213 | -0.83102 | 0.01451 | 1.796965409 | pos | ↓ |
| V772 | PC 39:3 | 0.4333 | -1.2066 | 0.0003459 | 2.260108225 | pos | ↓ |
| V773 | PC 39:4-1 | 0.42507 | -1.2342 | 0.00089737 | 2.174989235 | pos | ↓ |
| V774 | PC 39:5-1 | 0.14078 | -2.8285 | 0.00065316 | 2.199239531 | pos | ↓ |
| V775 | PC 39:6 | 0.60002 | -0.73691 | 0.010823 | 1.852677246 | pos | ↓ |
| V777 | PC 39:8 | 0.58409 | -0.77574 | 0.012456 | 1.81681462 | pos | ↓ |
| V782 | PC 40:3 | 0.66306 | -0.59279 | 0.014759 | 1.792327868 | pos | ↓ |
| V789 | PC 41:0 | 0.62703 | -0.6734 | 0.011238 | 1.844698538 | pos | ↓ |
| V792 | PC 41:3 | 0.41541 | -1.2674 | 0.03534 | 1.596687398 | pos | ↓ |
| V794 | PC 41:6 | 0.44941 | -1.1539 | 0.0028004 | 2.054488689 | pos | ↓ |
| V799 | PC 42:11 | 0.63126 | -0.66369 | 0.012591 | 1.815903958 | pos | ↓ |
| V800 | PC 42:2-1 | 0.57675 | -0.79397 | 0.037339 | 1.591510093 | pos | ↓ |
| V801 | PC 42:3 | 0.52779 | -0.92197 | 0.017998 | 1.752006587 | pos | ↓ |
| V805 | PC 42:7 | 0.64516 | -0.63226 | 0.045306 | 1.548872613 | pos | ↓ |
| V806 | PC 42:8 | 0.51384 | -0.9606 | 0.0045955 | 1.983665942 | pos | ↓ |
| V808 | PC 43:0 | 0.59101 | -0.75875 | 0.0029248 | 2.053159933 | pos | ↓ |
| V809 | PC 43:1 | 0.59566 | -0.74744 | 0.0082024 | 1.899880644 | pos | ↓ |
| V811 | PC 43:3 | 0.59492 | -0.74923 | 0.0204 | 1.725211922 | pos | ↓ |
| V817 | PC 44:10 | 0.61461 | -0.70227 | 0.0058072 | 1.936681403 | pos | ↓ |
| V821 | PC 44:3 | 0.57291 | -0.80362 | 0.010887 | 1.84851686 | pos | ↓ |
| V822 | PC 44:4 | 0.66351 | -0.59182 | 0.0048834 | 1.983233285 | pos | ↓ |
| V823 | PC 44:5 | 0.57695 | -0.79349 | 0.0017666 | 2.110377857 | pos | ↓ |
| V824 | PC 44:6 | 0.42256 | -1.2428 | 0.00030302 | 2.270091371 | pos | ↓ |
| V831 | PC 45:3 | 0.6473 | -0.62748 | 0.031266 | 1.630793717 | pos | ↓ |
| V832 | PC 45:4 | 0.66194 | -0.59522 | 0.0018773 | 2.103784395 | pos | ↓ |
| V833 | PC 45:5 | 0.50307 | -0.99117 | 0.00051363 | 2.233826259 | pos | ↓ |
| V840 | PC 46:5 | 0.6536 | -0.61353 | 0.049244 | 1.528928916 | pos | ↓ |
| V841 | PC 46:6 | 0.6214 | -0.68641 | 0.0066528 | 1.938970928 | pos | ↓ |
| V842 | PC 46:7 | 0.50976 | -0.9721 | 0.00071759 | 2.203967927 | pos | ↓ |
| V847 | PC 47:6 | 0.39 | -1.3585 | 0.01065 | 1.862413986 | pos | ↓ |
| V854 | PC 48:6 | 0.53289 | -0.90808 | 0.025767 | 1.692010813 | pos | ↓ |
| V855 | PC 48:7 | 0.60599 | -0.72262 | 0.0061789 | 1.946764199 | pos | ↓ |
| V861 | PC O-28:1 | 0.48179 | -1.0535 | 0.0025176 | 2.062904517 | pos | ↓ |
| V862 | PC O-28:2 | 0.64202 | -0.63932 | 0.0061162 | 1.943808392 | pos | ↓ |
| V863 | PC O-28:3 | 0.56734 | -0.81772 | 0.0036036 | 2.018505563 | pos | ↓ |
| V865 | PC O-29:1 | 0.51948 | -0.94486 | 0.0081383 | 1.896249542 | pos | ↓ |
| V867 | PC O-30:0 | 0.63005 | -0.66646 | 0.0073764 | 1.917686377 | pos | ↓ |
| V869 | PC O-30:2 | 0.37764 | -1.4049 | 0.031214 | 1.635002482 | pos | ↓ |
| V871 | PC O-31:0 | 0.42133 | -1.247 | 0.0031406 | 2.032833074 | pos | ↓ |
| V876 | PC O-32:2 | 0.43226 | -1.21 | 0.0061335 | 1.933416676 | pos | ↓ |
| V882 | PC O-33:3 | 3.8872 | 1.9587 | 7.91E-05 | 2.348864503 | pos | ↑ |
| V883 | PC O-33:4 | 2.9206 | 1.5462 | 0.00045487 | 2.223503705 | pos | ↑ |
| V888 | PC O-34:4-1 | 0.27253 | -1.8755 | 0.048014 | 1.515112639 | pos | ↓ |
| V889 | PC O-34:5-1 | 0.12137 | -3.0425 | 0.019952 | 1.720851418 | pos | ↓ |
| V895 | PC O-35:5 | 0.37397 | -1.419 | 0.042558 | 1.546968382 | pos | ↓ |
| V898 | PC O-36:2-1 | 0.46014 | -1.1198 | 0.017926 | 1.747043875 | pos | ↓ |
| V899 | PC O-36:3-1 | 0.57448 | -0.79968 | 0.022639 | 1.701412329 | pos | ↓ |
| V900 | PC O-36:4-1 | 0.61674 | -0.69727 | 0.014487 | 1.793406917 | pos | ↓ |
| V902 | PC O-36:6-1 | 0.43962 | -1.1857 | 0.00012488 | 2.316500989 | pos | ↓ |
| V903 | PC O-36:7 | 0.46002 | -1.1202 | 0.005019 | 1.972541309 | pos | ↓ |
| V910 | PC O-38:2-1 | 0.38172 | -1.3894 | 0.0027934 | 2.047773602 | pos | ↓ |
| V912 | PC O-38:4-1 | 0.54565 | -0.87396 | 0.00087631 | 2.170409937 | pos | ↓ |
| V914 | PC O-38:6-1 | 0.5902 | -0.76072 | 0.033864 | 1.619294763 | pos | ↓ |
| V915 | PC O-38:7 | 0.45873 | -1.1243 | 0.00013327 | 2.317911614 | pos | ↓ |
| V919 | PC O-40:2-1 | 0.60333 | -0.72897 | 0.0089379 | 1.883810038 | pos | ↓ |
| V921 | PC O-40:4-1 | 0.40477 | -1.3048 | 0.00046002 | 2.234969233 | pos | ↓ |
| V922 | PC O-40:5-1 | 0.51858 | -0.94737 | 0.010472 | 1.848367797 | pos | ↓ |
| V923 | PC O-40:6-1 | 0.59927 | -0.73873 | 0.00995 | 1.866411503 | pos | ↓ |
| V925 | PC O-40:8 | 0.5249 | -0.92989 | 0.0040975 | 2.008658939 | pos | ↓ |
| V926 | PC O-40:9 | 0.50748 | -0.97856 | 0.0099222 | 1.858630216 | pos | ↓ |
| V930 | PC O-42:3-1 | 0.41147 | -1.2811 | 0.028161 | 1.6504502 | pos | ↓ |
| V932 | PC O-42:5-1 | 0.43638 | -1.1963 | 0.0099017 | 1.863097899 | pos | ↓ |
| V933 | PC O-42:6-1 | 0.45924 | -1.1227 | 0.0010884 | 2.161514137 | pos | ↓ |
| V934 | PC O-42:7-1 | 0.49052 | -1.0276 | 0.016449 | 1.770770681 | pos | ↓ |
| V939 | PC O-43:3 | 0.49328 | -1.0195 | 0.034975 | 1.616708736 | pos | ↓ |
| V968 | PE 33:3 | 0.24701 | -2.0173 | 0.038959 | 1.5739042 | pos | ↓ |
| V998 | PE 37:7 | 0.48254 | -1.0513 | 0.041592 | 1.558321604 | pos | ↓ |
| V1039 | PE 42:6 | 0.57861 | -0.78934 | 0.034776 | 1.611827223 | pos | ↓ |
| V1044 | PE 43:3 | 0.6331 | -0.6595 | 0.03232 | 1.637964223 | pos | ↓ |
| V1051 | PE 44:12 | 0.40154 | -1.3164 | 0.023466 | 1.708954908 | pos | ↓ |
| V1056 | PE 44:6 | 0.5254 | -0.92852 | 0.011742 | 1.826466273 | pos | ↓ |
| V1080 | PE 48:4 | 0.31216 | -1.6796 | 0.033955 | 1.606603485 | pos | ↓ |
| V1107 | PE O-34:4 | 0.65977 | -0.59997 | 0.00063151 | 2.192718604 | pos | ↓ |
| V1119 | PE O-36:3-1 | 0.58758 | -0.76714 | 0.0084884 | 1.880604348 | pos | ↓ |
| V1127 | PE O-36:5 | 0.24873 | -2.0073 | 0.016439 | 1.765261217 | pos | ↓ |
| V1130 | PE O-36:5-4 | 0.51163 | -0.96682 | 0.049591 | 1.521080271 | pos | ↓ |
| V1131 | PE O-36:6-1 | 0.54021 | -0.88842 | 0.045607 | 1.535396051 | pos | ↓ |
| V1155 | PE O-38:5-6 | 0.60308 | -0.72959 | 0.010942 | 1.831436437 | pos | ↓ |
| V1156 | PE O-38:6 | 0.61276 | -0.7066 | 0.028484 | 1.648691996 | pos | ↓ |
| V1157 | PE O-38:6-1 | 0.59969 | -0.73772 | 0.00098655 | 2.155379869 | pos | ↓ |
| V1158 | PE O-38:6-2 | 0.5557 | -0.84763 | 0.0079268 | 1.895496062 | pos | ↓ |
| V1160 | PE O-38:6-5 | 0.56246 | -0.83018 | 0.00031862 | 2.257359677 | pos | ↓ |
| V1161 | PE O-38:7-1 | 0.64591 | -0.6306 | 0.0054321 | 1.958170574 | pos | ↓ |
| V1162 | PE O-38:7-2 | 0.62123 | -0.68681 | 0.0023758 | 2.058785661 | pos | ↓ |
| V1184 | PE O-40:6-3 | 0.2747 | -1.8641 | 0.0046549 | 1.974521064 | pos | ↓ |
| V1191 | PE O-40:7-8 | 0.62143 | -0.68634 | 0.015255 | 1.78475595 | pos | ↓ |
| V1193 | PE O-40:8-2 | 0.47986 | -1.0593 | 0.014958 | 1.788761466 | pos | ↓ |
| V1194 | PE O-40:9 | 0.47039 | -1.0881 | 0.001879 | 2.1038501 | pos | ↓ |
| V364 | PG 40:0 | 2.2985 | 1.2007 | 0.026885 | 1.915487895 | neg | ↑ |
| V369 | PG 40:6-2 | 0.45762 | -1.1278 | 0.039894 | 1.786860819 | neg | ↓ |
| V370 | PG 40:7-1 | 0.54986 | -0.86285 | 0.046925 | 1.717246619 | neg | ↓ |
| V386 | PG 42:9-1 | 0.59355 | -0.75255 | 0.043257 | 1.761490772 | neg | ↓ |
| V395 | PG 44:4 | 2.2821 | 1.1904 | 0.035707 | 1.94367586 | neg | ↑ |
| V638 | PGD2 | 2.1341 | 1.0936 | 0.0091126 | 2.107649562 | neg | ↑ |
| V635 | PGE2 | 2.1755 | 1.1213 | 0.004392 | 2.241601882 | neg | ↑ |
| V77 | PI 35:2 | 0.45458 | -1.1374 | 0.036039 | 1.808993847 | neg | ↓ |
| V98 | PI 37:2-1 | 0.45253 | -1.1439 | 0.013585 | 2.045511346 | neg | ↓ |
| V100 | PI 37:3 | 0.4596 | -1.1216 | 0.0034685 | 2.328538033 | neg | ↓ |
| V101 | PI 37:4 | 0.48909 | -1.0318 | 0.014667 | 2.006343676 | neg | ↓ |
| V123 | PI 39:3 | 0.44293 | -1.1749 | 0.0038575 | 2.416576439 | neg | ↓ |
| V124 | PI 39:4 | 0.45134 | -1.1477 | 0.001751 | 2.570678332 | neg | ↓ |
| V126 | PI 39:6-1 | 0.3209 | -1.6398 | 7.56E-05 | 2.806819997 | neg | ↓ |
| V127 | PI 39:6-2 | 0.51062 | -0.96967 | 0.0072076 | 2.213528595 | neg | ↓ |
| V129 | PI 40:1-2 | 0.51343 | -0.96177 | 0.0045717 | 2.22349981 | neg | ↓ |
| V148 | PI 41:6 | 0.30106 | -1.7319 | 0.015602 | 2.169726902 | neg | ↓ |
| V154 | PI 42:6 | 0.49763 | -1.0069 | 0.014838 | 2.000717884 | neg | ↓ |
| V166 | PI 44:1 | 1.9057 | 0.93033 | 0.0060791 | 2.16687224 | neg | ↑ |
| V167 | PI 44:2 | 2.3409 | 1.2271 | 0.0010716 | 2.416967735 | neg | ↑ |
| V173 | PI 44:8 | 1.5671 | 0.6481 | 0.040825 | 1.748562942 | neg | ↑ |
| V174 | PI 44:9 | 0.62472 | -0.67872 | 0.029098 | 1.860259095 | neg | ↓ |
| V231 | PS 38:2-2 | 0.54077 | -0.88692 | 0.016237 | 1.977647505 | neg | ↓ |
| V259 | PS 41:3 | 1.512 | 0.5965 | 0.0030456 | 2.318553505 | neg | ↑ |
| V268 | PS 42:6 | 2.6369 | 1.3988 | 0.036806 | 1.784589808 | neg | ↑ |
| V295 | PS 45:3 | 0.59962 | -0.73789 | 0.02619 | 1.874387737 | neg | ↓ |
| V1222 | SM 29:1 | 0.53591 | -0.89993 | 0.0011939 | 2.152778595 | pos | ↓ |
| V1226 | SM 31:1 | 0.44164 | -1.1791 | 0.0048407 | 1.976144906 | pos | ↓ |
| V1227 | SM 32:0 | 0.59096 | -0.75888 | 0.019512 | 1.734821956 | pos | ↓ |
| V1228 | SM 32:1 | 0.56977 | -0.81154 | 0.022914 | 1.699873069 | pos | ↓ |
| V1229 | SM 32:2 | 0.64062 | -0.64245 | 0.0091644 | 1.878884541 | pos | ↓ |
| V1233 | SM 33:2 | 0.40604 | -1.3003 | 0.036719 | 1.595127939 | pos | ↓ |
| V1252 | SM 37:3 | 0.33021 | -1.5985 | 0.03709 | 1.579755436 | pos | ↓ |
| V1257 | SM 38:4 | 2.3242 | 1.2167 | 0.015528 | 1.77376383 | pos | ↑ |
| V1258 | SM 38:5 | 13.692 | 3.7752 | 9.63E-05 | 2.34268081 | pos | ↑ |
| V1270 | SM 40:6 | 5.4565 | 2.448 | 4.75E-08 | 2.564679699 | pos | ↑ |
| V1286 | SM 43:2 | 0.54178 | -0.88421 | 0.011678 | 1.837887568 | pos | ↓ |
| V1295 | SM 46:2 | 0.49772 | -1.0066 | 0.017522 | 1.758680497 | pos | ↓ |
| V5 | SM(d18:1/12:0) | 0.41574 | -1.2663 | 0.017371 | 2.061704949 | neg | ↓ |
| V6 | SM(d18:1/12:0) | 0.3587 | -1.4792 | 0.027182 | 2.018450393 | neg | ↓ |
| V1562 | TG 53:7-3 | 0.20936 | -2.2559 | 0.031193 | 1.623964263 | pos | ↓ |
| V1563 | TG 53:7-3-a | 0.23336 | -2.0994 | 0.036979 | 1.582155163 | pos | ↓ |
| V1564 | TG 53:8-a | 0.65758 | -0.60475 | 0.015039 | 1.78234884 | pos | ↓ |
| V1569 | TG 54:10-2-a | 0.2231 | -2.1642 | 0.0415 | 1.550971528 | pos | ↓ |
| V1592 | TG 54:4-4-a | 1.7939 | 0.84313 | 0.013741 | 1.800514009 | pos | ↑ |
| V1613 | TG 54:7-2 | 0.29907 | -1.7414 | 0.017635 | 1.747671827 | pos | ↓ |
| V1662 | TG 55:5-1-a | 0.61474 | -0.70194 | 0.01471 | 1.779114766 | pos | ↓ |
| V1668 | TG 55:6-2-a | 0.4812 | -1.0553 | 0.0098657 | 1.849495269 | pos | ↓ |
| V1669 | TG 55:6-3 | 0.48393 | -1.0471 | 0.030537 | 1.63007791 | pos | ↓ |
| V1675 | TG 55:7-2-a | 0.50672 | -0.98074 | 0.030506 | 1.630917702 | pos | ↓ |
| V1685 | TG 55:8-2-a | 0.25689 | -1.9608 | 0.011111 | 1.837061132 | pos | ↓ |
| V1686 | TG 55:8-3 | 0.2759 | -1.8578 | 0.0018924 | 2.089691767 | pos | ↓ |
| V1687 | TG 55:8-3-a | 0.31681 | -1.6583 | 0.037262 | 1.579032732 | pos | ↓ |
| V1693 | TG 56:10-1-a | 0.14929 | -2.7438 | 0.023887 | 1.682812825 | pos | ↓ |
| V1720 | TG 56:4-1 | 1.6952 | 0.76144 | 0.013845 | 1.795286703 | pos | ↑ |
| V1729 | TG 56:4-5-a | 1.9386 | 0.95504 | 0.0052647 | 1.961079927 | pos | ↑ |
| V1756 | TG 56:8-2 | 0.42074 | -1.249 | 0.019683 | 1.737114224 | pos | ↓ |
| V1758 | TG 56:8-4 | 0.53344 | -0.9066 | 0.015498 | 1.787173787 | pos | ↓ |
| V1759 | TG 56:8-5 | 0.43724 | -1.1935 | 0.010896 | 1.845739682 | pos | ↓ |
| V1760 | TG 56:8-5-a | 0.62514 | -0.67774 | 0.012631 | 1.819425806 | pos | ↓ |
| V1762 | TG 56:9-2 | 0.15971 | -2.6465 | 0.0085926 | 1.87715557 | pos | ↓ |
| V1768 | TG 57:10-1-a | 0.24829 | -2.0099 | 0.016325 | 1.771159327 | pos | ↓ |
| V1782 | TG 57:6-2 | 0.52769 | -0.92224 | 0.034315 | 1.606145294 | pos | ↓ |
| V1783 | TG 57:6-3 | 0.59438 | -0.75054 | 0.012828 | 1.814471932 | pos | ↓ |
| V1788 | TG 57:7-2-a | 0.44893 | -1.1554 | 0.0005651 | 2.211027642 | pos | ↓ |
| V1789 | TG 57:7-3 | 0.4782 | -1.0643 | 0.0051947 | 1.962949956 | pos | ↓ |
| V1792 | TG 57:8-1-a | 0.3893 | -1.3611 | 0.00019726 | 2.301432168 | pos | ↓ |
| V1793 | TG 57:8-2 | 0.36753 | -1.4441 | 0.00067489 | 2.201254371 | pos | ↓ |
| V1795 | TG 57:9-2-a | 0.2773 | -1.8505 | 0.0062906 | 1.932087835 | pos | ↓ |
| V1799 | TG 58:10-1 | 0.52037 | -0.9424 | 0.049909 | 1.515847981 | pos | ↓ |
| V1800 | TG 58:10-1-a | 0.26227 | -1.9309 | 0.0056582 | 1.951975278 | pos | ↓ |
| V1801 | TG 58:10-2 | 0.24366 | -2.0371 | 0.010768 | 1.847722022 | pos | ↓ |
| V1806 | TG 58:10-5-a | 0.52282 | -0.93562 | 0.048287 | 1.522419351 | pos | ↓ |
| V1812 | TG 58:11-3 | 0.23085 | -2.115 | 0.020019 | 1.725481338 | pos | ↓ |
| V1813 | TG 58:11-4 | 0.2588 | -1.9501 | 0.014939 | 1.789405056 | pos | ↓ |
| V1816 | TG 58:12-1 | 0.13515 | -2.8873 | 0.016596 | 1.770685453 | pos | ↓ |
| V1817 | TG 58:12-1-a | 0.30705 | -1.7034 | 0.02021 | 1.72795395 | pos | ↓ |
| V1818 | TG 58:12-2-a | 0.16852 | -2.569 | 0.047095 | 1.52479281 | pos | ↓ |
| V1819 | TG 58:12-3 | 0.3896 | -1.3599 | 0.044779 | 1.53625354 | pos | ↓ |
| V1820 | TG 58:12-3-a | 0.21509 | -2.217 | 0.044838 | 1.53816871 | pos | ↓ |
| V1823 | TG 58:13-2 | 0.18531 | -2.432 | 0.0068767 | 1.921068149 | pos | ↓ |
| V1855 | TG 58:8-3 | 0.51627 | -0.9538 | 0.035646 | 1.591575305 | pos | ↓ |
| V1867 | TG 59:10-a | 0.23318 | -2.1005 | 0.004658 | 1.980698383 | pos | ↓ |
| V1868 | TG 59:11-1-a | 0.26456 | -1.9184 | 0.0011114 | 2.149032117 | pos | ↓ |
| V1869 | TG 59:11-2-a | 0.14512 | -2.7846 | 0.0066156 | 1.923748723 | pos | ↓ |
| V1878 | TG 59:7-2 | 0.59449 | -0.75029 | 0.042596 | 1.556457705 | pos | ↓ |
| V1886 | TG 60:11-1-a | 0.36057 | -1.4717 | 0.045797 | 1.534710329 | pos | ↓ |
| V1887 | TG 60:11-2 | 0.55295 | -0.85477 | 0.048213 | 1.532888074 | pos | ↓ |
| V1891 | TG 60:12-2 | 0.32469 | -1.6229 | 0.0081979 | 1.896569456 | pos | ↓ |
| V1892 | TG 60:12-3 | 0.23633 | -2.0811 | 0.0055175 | 1.963012518 | pos | ↓ |
| V1893 | TG 60:12-3-a | 0.38623 | -1.3725 | 0.030172 | 1.642736647 | pos | ↓ |
| V1894 | TG 60:12-4 | 0.21287 | -2.2319 | 0.0060716 | 1.949550478 | pos | ↓ |
| V1895 | TG 60:12-4-a | 0.24823 | -2.0102 | 0.0052717 | 1.968951859 | pos | ↓ |
| V1896 | TG 60:13-1-a | 0.09467 | -3.4009 | 0.0049947 | 1.974613804 | pos | ↓ |
| V1898 | TG 60:13-3 | 0.086281 | -3.5348 | 0.0064204 | 1.938202256 | pos | ↓ |
| V1899 | TG 60:14 | 0.12288 | -3.0246 | 0.0075242 | 1.912231296 | pos | ↓ |
| V1928 | TG 61:11-a | 0.32717 | -1.6119 | 0.00074478 | 2.200450094 | pos | ↓ |
| V1929 | TG 61:12-a | 0.17599 | -2.5064 | 0.00020029 | 2.295598846 | pos | ↓ |
| V1935 | TG 62:10-1 | 0.27824 | -1.8456 | 0.00090687 | 2.177729214 | pos | ↓ |
| V1938 | TG 62:11-2 | 0.59291 | -0.75412 | 0.0342 | 1.613212994 | pos | ↓ |
| V1939 | TG 62:11-3 | 0.53013 | -0.91557 | 0.01721 | 1.76481709 | pos | ↓ |
| V1940 | TG 62:12-1 | 0.39161 | -1.3525 | 0.0070243 | 1.922554804 | pos | ↓ |
| V1941 | TG 62:12-1-a | 0.31092 | -1.6854 | 0.0048859 | 1.978168198 | pos | ↓ |
| V1943 | TG 62:12-2-a | 0.31577 | -1.6631 | 0.0031476 | 2.037886213 | pos | ↓ |
| V1944 | TG 62:12-3 | 0.2692 | -1.8932 | 0.0048855 | 1.977670576 | pos | ↓ |
| V1946 | TG 62:13-1-a | 0.19171 | -2.383 | 0.0010253 | 2.16589125 | pos | ↓ |
| V1947 | TG 62:13-2 | 0.17857 | -2.4854 | 0.00073313 | 2.197081509 | pos | ↓ |
| V1948 | TG 62:13-3 | 0.22517 | -2.1509 | 0.004887 | 1.979503593 | pos | ↓ |
| V1949 | TG 62:14 | 0.10092 | -3.3088 | 0.0014064 | 2.13532591 | pos | ↓ |
| V1950 | TG 62:15 | 0.15212 | -2.7167 | 0.015429 | 1.790643385 | pos | ↓ |
| V1969 | TG 64:13-a | 0.34642 | -1.5294 | 0.00056994 | 2.219120844 | pos | ↓ |
| V1970 | TG 64:16-1 | 0.16111 | -2.6339 | 0.010664 | 1.850280789 | pos | ↓ |
| V1972 | TG 64:17 | 0.065392 | -3.9348 | 0.00092359 | 2.176879361 | pos | ↓ |
| V1979 | TG 64:7-2 | 0.3113 | -1.6836 | 0.029441 | 1.645713459 | pos | ↓ |

**Supplementary Table 9:** **Differential metabolites of three groups**

| Compounds | f.value | p.value |
| --- | --- | --- |
| 16-HETE | 6.5183 | 0.009178 |
| Alpha-Tocopherol | 8.8961 | 0.002834 |
| CAR 16:0 | 6.3917 | 0.0098239 |
| CAR 16:1 | 5.4712 | 0.016429 |
| CAR 16:3 | 16.67 | 0.00015431 |
| CAR 16:4 | 19.03 | 7.67E-05 |
| CAR 17:0 | 4.7993 | 0.024482 |
| CAR 18:0 | 11.057 | 0.0011198 |
| CAR 18:1 | 14.23 | 0.0003428 |
| CAR 18:3 | 4.7247 | 0.025626 |
| CAR 19:0 | 4.3702 | 0.031954 |
| CAR 20:0 | 7.8485 | 0.0046502 |
| CAR 20:1 | 15.316 | 0.00023778 |
| CAR 20:2 | 13.012 | 0.0005284 |
| CAR 21:0 | 8.1834 | 0.0039551 |
| CAR 22:0 | 7.234 | 0.0063177 |
| CAR 22:1 | 20.335 | 5.35E-05 |
| CAR 22:4 | 7.385 | 0.0058524 |
| CAR 23:0 | 7.9993 | 0.0043214 |
| CAR 24:0 | 7.3476 | 0.0059641 |
| CAR 24:1 | 4.2235 | 0.035077 |
| CAR 24:2 | 4.1404 | 0.037001 |
| CAR 24:4 | 10.728 | 0.0012809 |
| CAR 24:5 | 14.113 | 0.00035698 |
| Cer 34:3-3 | 4.6006 | 0.027664 |
| Cer 35:3-1 | 4.9456 | 0.022405 |
| Cer 38:2-5 | 22.306 | 3.20E-05 |
| Cer 40:1-3 | 10.001 | 0.0017381 |
| Cer 40:1-4 | 7.051 | 0.0069384 |
| Cer 40:2-1 | 6.2119 | 0.010833 |
| Cer 40:2-4 | 10.014 | 0.0017283 |
| Cer 40:4-3 | 7.027 | 0.0070249 |
| Cer 40:5-3 | 8.429 | 0.00352 |
| Cer 40:5-4 | 6.006 | 0.012134 |
| Cer 41:1-2 | 16.662 | 0.00015471 |
| Cer 42:0-2 | 5.9407 | 0.012583 |
| Cer 42:1-3 | 13.102 | 0.00051123 |
| Cer 42:1-4 | 17.23 | 0.00012996 |
| Cer 42:2-3 | 57.575 | 9.17E-08 |
| Cer 43:0-1 | 4.7373 | 0.025429 |
| Cer 44:1-1 | 7.9487 | 0.0044287 |
| Cer 44:1-2 | 8.4634 | 0.0034635 |
| Cer 44:1-3 | 5.5729 | 0.015494 |
| Cer 44:2-2 | 6.0603 | 0.011775 |
| CoQ10 | 11.467 | 0.00095058 |
| DG 36:6-4 | 6.8733 | 0.0076081 |
| EQYDS/ZQYDS/TYDS/SQYDS/-HBDS/XQYDSY | 5.4335 | 0.016791 |
| FA(16:2) | 5.6469 | 0.014852 |
| Hex2Cer 34:2-6 | 4.1604 | 0.036527 |
| Hex2Cer 36:2-2 | 4.4842 | 0.029743 |
| Hex2Cer 36:2-5 | 4.7169 | 0.025749 |
| Hex2Cer 40:2-4 | 4.5516 | 0.028519 |
| Hex2Cer 44:1-1 | 4.7192 | 0.025712 |
| HexCer 33:1-5 | 4.5197 | 0.029092 |
| HexCer 34:1-4 | 4.5265 | 0.028967 |
| HexCer 34:2-6 | 4.0623 | 0.038917 |
| HexCer 36:2-6 | 4.2699 | 0.034055 |
| HexCer 36:3-2 | 5.7973 | 0.013638 |
| HexCer 38:4-6 | 4.1399 | 0.037012 |
| HexCer 40:5-2 | 5.8802 | 0.013016 |
| HexCer 40:5-4 | 6.5295 | 0.0091231 |
| HexCer 40:7-1 | 14.625 | 0.00029941 |
| HexCer 42:2-2 | 4.3297 | 0.032785 |
| LPC 11:0 | 9.0087 | 0.0026922 |
| LPC O-18:2-2 | 9.9524 | 0.0017744 |
| LPE 16:0 | 14.051 | 0.00036471 |
| LPE 16:0-2 | 15.209 | 0.00024631 |
| LPE 18:0 | 13.302 | 0.00047555 |
| LPE 20:0 | 4.5882 | 0.027877 |
| LPE 20:3 | 9.1105 | 0.002571 |
| LPE 20:4 | 10.392 | 0.0014725 |
| LPE 22:5 | 7.2271 | 0.0063397 |
| LPE 22:6 | 11.052 | 0.0011219 |
| LPE O-18:3 | 9.5164 | 0.0021451 |
| LPE(16:0) | 5.5405 | 0.015785 |
| PA(18:1_20:0)-H | 5.6079 | 0.015187 |
| PA(20:0_22:6)-H | 7.9587 | 0.0044072 |
| PC 31:5 | 3.8233 | 0.045514 |
| PC 32:5 | 8.9975 | 0.0027059 |
| PC 34:6 | 9.8278 | 0.0018723 |
| PC 36:0 | 5.8498 | 0.01324 |
| PC 38:1-1 | 6.5762 | 0.0088986 |
| PC 40:5-1 | 5.9027 | 0.012853 |
| PC 43:6 | 11.919 | 0.00079656 |
| PC O-31:0 | 9.3008 | 0.0023604 |
| PC O-33:0 | 4.1812 | 0.036041 |
| PC O-36:5-1 | 8.7161 | 0.0030787 |
| PC O-42:6-1 | 10.768 | 0.0012596 |
| PE 27:2 | 10.349 | 0.001499 |
| PE 31:0 | 4.8788 | 0.023328 |
| PE 32:4 | 5.8945 | 0.012913 |
| PE 32:5 | 4.0976 | 0.038035 |
| PE 34:0 | 9.7413 | 0.0019439 |
| PE 34:5 | 6.6903 | 0.0083758 |
| PE 36:4 | 5.2686 | 0.018488 |
| PE 36:6 | 4.2338 | 0.034846 |
| PE 38:4-1 | 3.9308 | 0.042403 |
| PE 38:6 | 11.016 | 0.0011387 |
| PE 38:7-1 | 5.977 | 0.012331 |
| PE 40:4-1 | 4.79 | 0.024622 |
| PE 40:5 | 6.2922 | 0.010368 |
| PE 40:6-1 | 8.0769 | 0.0041624 |
| PE 40:8 | 10.309 | 0.0015246 |
| PE 40:9-1 | 10.132 | 0.0016429 |
| PE 42:9 | 7.1107 | 0.0067287 |
| PE 44:1 | 3.8654 | 0.044265 |
| PE O-27:0 | 4.063 | 0.038898 |
| PE O-31:1 | 4.3076 | 0.033246 |
| PE O-32:1 | 8.5196 | 0.0033734 |
| PE O-33:0 | 9.4746 | 0.0021851 |
| PE O-33:1 | 7.6056 | 0.0052412 |
| PE O-34:2-1 | 6.3412 | 0.010096 |
| PE O-37:0 | 11.814 | 0.00082962 |
| PE O-39:1 | 5.1741 | 0.019547 |
| PE O-40:7-2 | 4.4803 | 0.029815 |
| PE O-40:8-1 | 6.6736 | 0.00845 |
| PG 36:3-2 | 4.5859 | 0.027918 |
| PG 37:5 | 4.8913 | 0.023152 |
| PG 41:6 | 6.4112 | 0.0097216 |
| PG 42:6 | 7.1843 | 0.0064796 |
| PI 32:0 | 6.5339 | 0.0091018 |
| PI 32:1 | 5.7702 | 0.013848 |
| PI 34:3 | 4.706 | 0.025922 |
| PI 35:4 | 5.0204 | 0.02142 |
| PI 38:0 | 4.5759 | 0.02809 |
| PI 38:1 | 3.9578 | 0.041659 |
| PI 38:6-1 | 5.5977 | 0.015275 |
| PI 38:6-2 | 5.3109 | 0.018035 |
| PI 39:6-1 | 25.225 | 1.59E-05 |
| PI 44:2 | 9.6137 | 0.0020553 |
| PS 34:1-1 | 6.3555 | 0.010018 |
| PS 36:1-1 | 11.285 | 0.0010219 |
| PS 44:6 | 5.8674 | 0.01311 |
| SM 35:4 | 5.9122 | 0.012785 |
| SM 38:5 | 16.661 | 0.00015473 |
| SM 40:0 | 12.805 | 0.00056999 |
| TG 56:11-2 | 6.0998 | 0.01152 |
| TG 56:4-1 | 12.138 | 0.00073232 |
| TG 56:5-3 | 6.9085 | 0.00747 |
| TG 56:5-5 | 6.4551 | 0.0094945 |
| TG 56:5-6-a | 6.2024 | 0.010889 |
| TG 56:6-4 | 5.5802 | 0.015429 |
| TG 56:9-4 | 5.4622 | 0.016515 |
| TG 57:9-2 | 12.043 | 0.00075947 |
| TG(e)54:2 | 3.8974 | 0.043344 |
| TG(p)48:1 | 4.8583 | 0.023619 |

| Var ID | Compounds | Fold Change  (FC) | log2(FC) | P | VIP | Trend |
| --- | --- | --- | --- | --- | --- | --- |
| V1 | Sulfocysteine | 1.6289 | 0.70386 | 0.017572 | 1.532131582 | ↑ |
| V2 | N-acetylneuraminic acid | 7.4732 | 2.9017 | 0.014894 | 1.669185955 | ↑ |
| V3 | Serine | 1.6843 | 0.75218 | 0.00031022 | 1.969028188 | ↑ |
| V4 | Glycine | 1.3486 | 0.43148 | 0.024985 | 1.434360666 | ↑ |
| V5 | Taurine | 0.70763 | -0.49892 | 0.015239 | 1.586774958 | ↓ |
| V9 | Histidine | 1.5978 | 0.67613 | 0.014218 | 1.60104427 | ↑ |
| V26 | Kynurenine | 0.56595 | -0.82126 | 0.0043208 | 1.723802215 | ↓ |

**Supplementary Table 10** **Differential metabolites of DAT versus RNC**

**Supplementary Table 11** **Differential metabolites of DAT versus DNC**

| Var ID | Compounds | Fold Change  (FC) | log2(FC) | P | VIP | Trend |
| --- | --- | --- | --- | --- | --- | --- |
| V2 | N-acetylneuraminic acid | 3.1705 | 1.6647 | 0.035121 | 1.774374838 | ↑ |
| V9 | Histidine | 2.0796 | 1.0563 | 0.0013648 | 2.254605828 | ↑ |
| V12 | Proline | 0.69869 | -0.51727 | 0.0007366 | 2.320560942 | ↓ |
| V29 | Tryptophan | 0.69628 | -0.52225 | 0.023502 | 1.744834404 | ↓ |

**Supplementary Table 12** **Differential metabolites of RNC versus DNC**

| Var ID | Compounds | Fold Change  (FC) | log2(FC) | P | VIP | Trend |
| --- | --- | --- | --- | --- | --- | --- |
| V1 | Sulfocysteine | 1.6289 | 0.70386 | 0.017572 | 1.532131582 | ↑ |
| V2 | N-acetylneuraminic acid | 7.4732 | 2.9017 | 0.014894 | 1.669185955 | ↑ |
| V3 | Serine | 1.6843 | 0.75218 | 0.00031022 | 1.969028188 | ↑ |
| V4 | Glycine | 1.3486 | 0.43148 | 0.024985 | 1.434360666 | ↑ |
| V5 | Taurine | 0.70763 | -0.49892 | 0.015239 | 1.586774958 | ↓ |
| V9 | Histidine | 1.5978 | 0.67613 | 0.014218 | 1.60104427 | ↑ |
| V26 | Kynurenine | 0.56595 | -0.82126 | 0.0043208 | 1.723802215 | ↓ |

**Supplementary Table 13** **Differential metabolites of DPL versus DAT**

| Var ID | Compounds | Fold Change  (FC) | log2(FC) | P | VIP | Trend |
| --- | --- | --- | --- | --- | --- | --- |
| V1 | Sulfocysteine | 1.8052 | 0.85214 | 0.019297 | 1.831213006 | ↑ |
| V3 | Serine | 1.3693 | 0.45342 | 0.011094 | 1.91779484 | ↑ |

**Supplementary Table 14** **Differential metabolites of DRL versus DAT**

| Var ID | Compounds | Fold Change  (FC) | log2(FC) | P | VIP | Trend |
| --- | --- | --- | --- | --- | --- | --- |
| V3 | Serine | 1.279 | 0.35498 | 0.043225 | 1.910362004 | ↑ |
| V15 | Arginine | 0.63609 | -0.65271 | 0.0013443 | 2.498179629 | ↓ |

**Supplementary figure 1 Differential metabolites of DAT versus RNC**

**
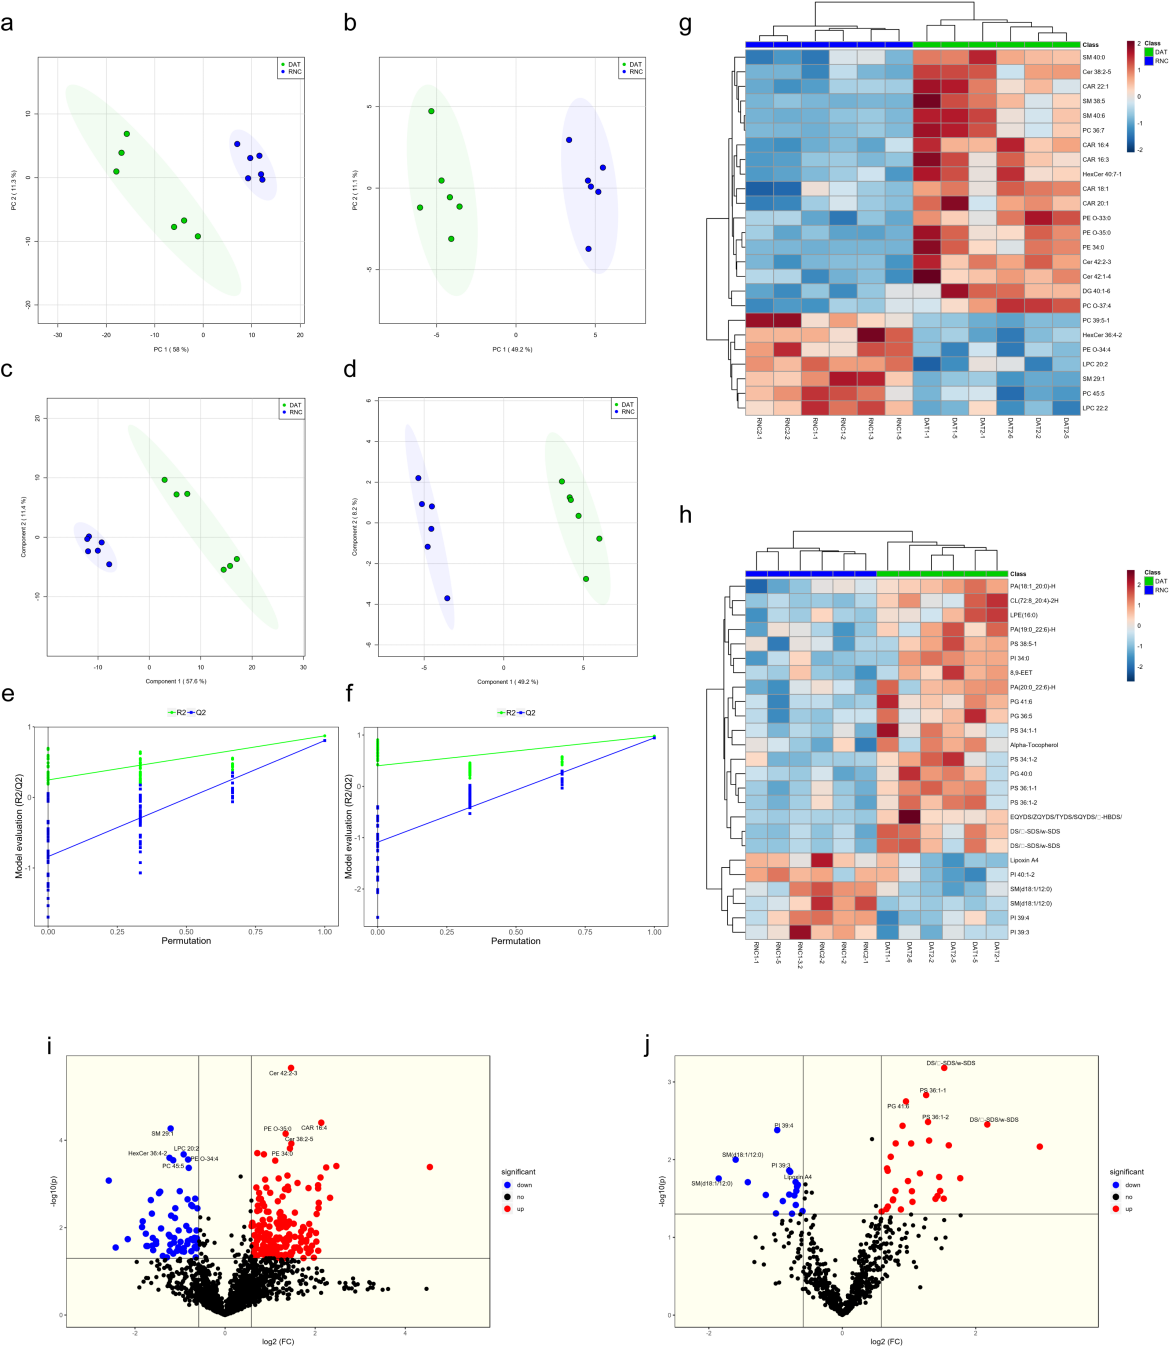
**

Figure S1. Metabolomics Profile of DAT versus RNC (a, b) Scores scatter plot of PCA; (c-f) Scores scatter plot of PLS-DA; (g, h) cluster analysis (heatmap);

(i, j )Volcano plot.

**Supplementary figure 2 Differential metabolites of DAT versus DNC**

**
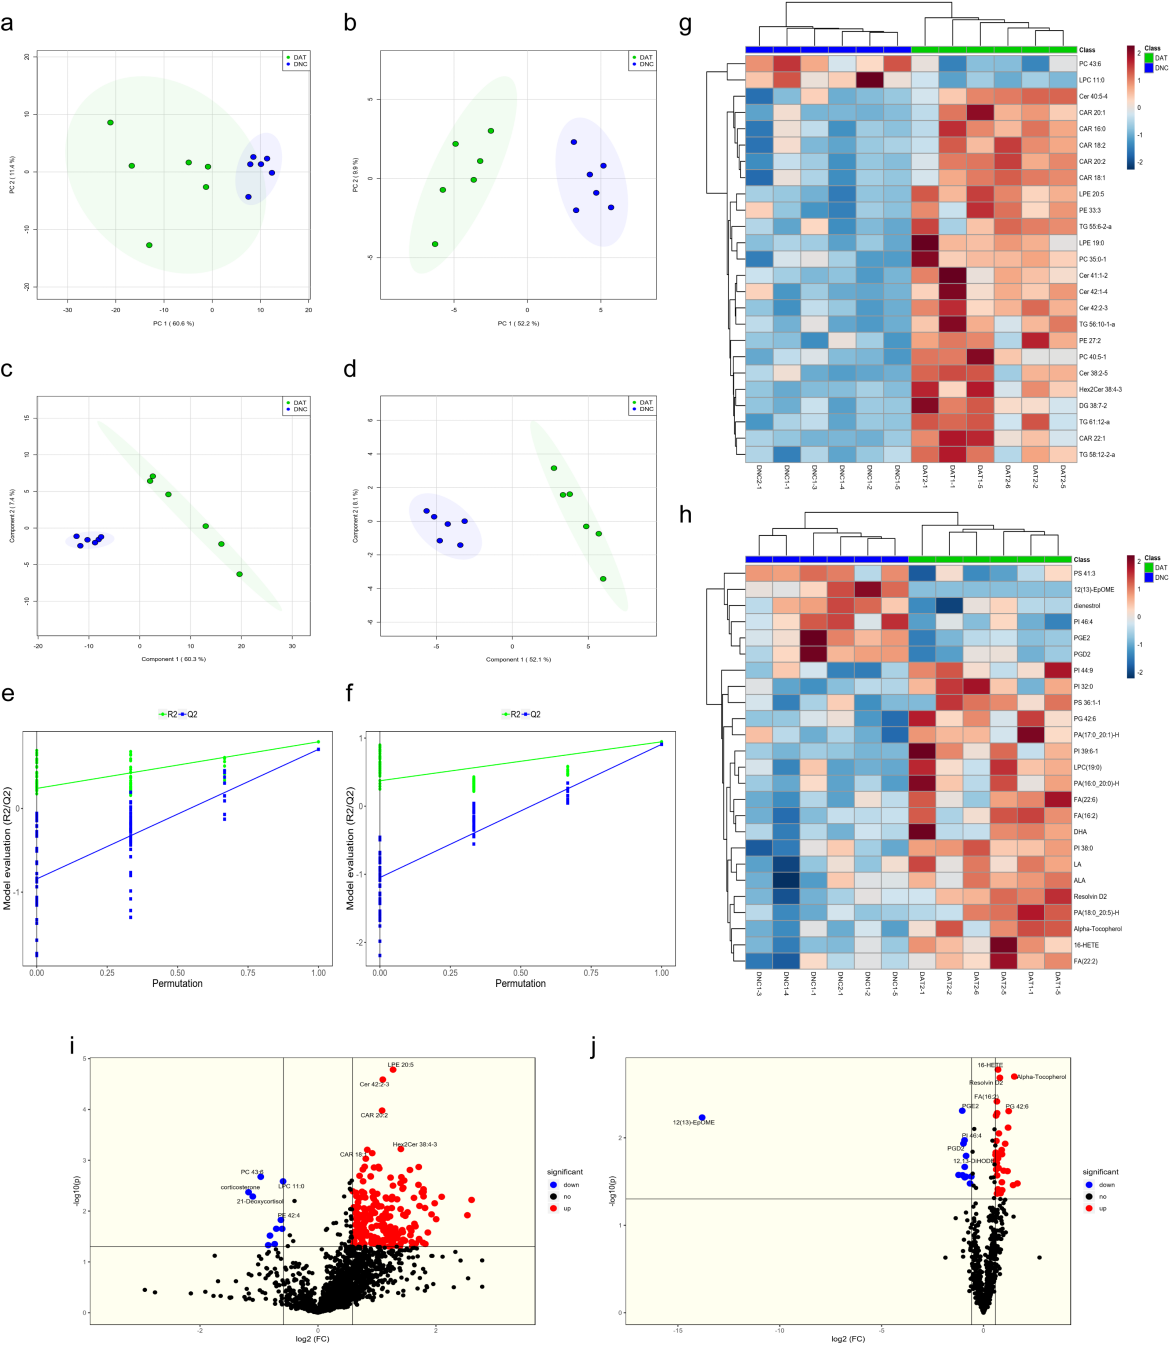
**

Figure S2. Metabolomics Profile of DAT versus DNC (a, b) Scores scatter plot of PCA; (c-f) Scores scatter plot of PLS-DA; (g, h) cluster analysis (heatmap);

(i, j )Volcano plot.

**Supplementary figure 3 Differential metabolites of DNC versus RNC**

**
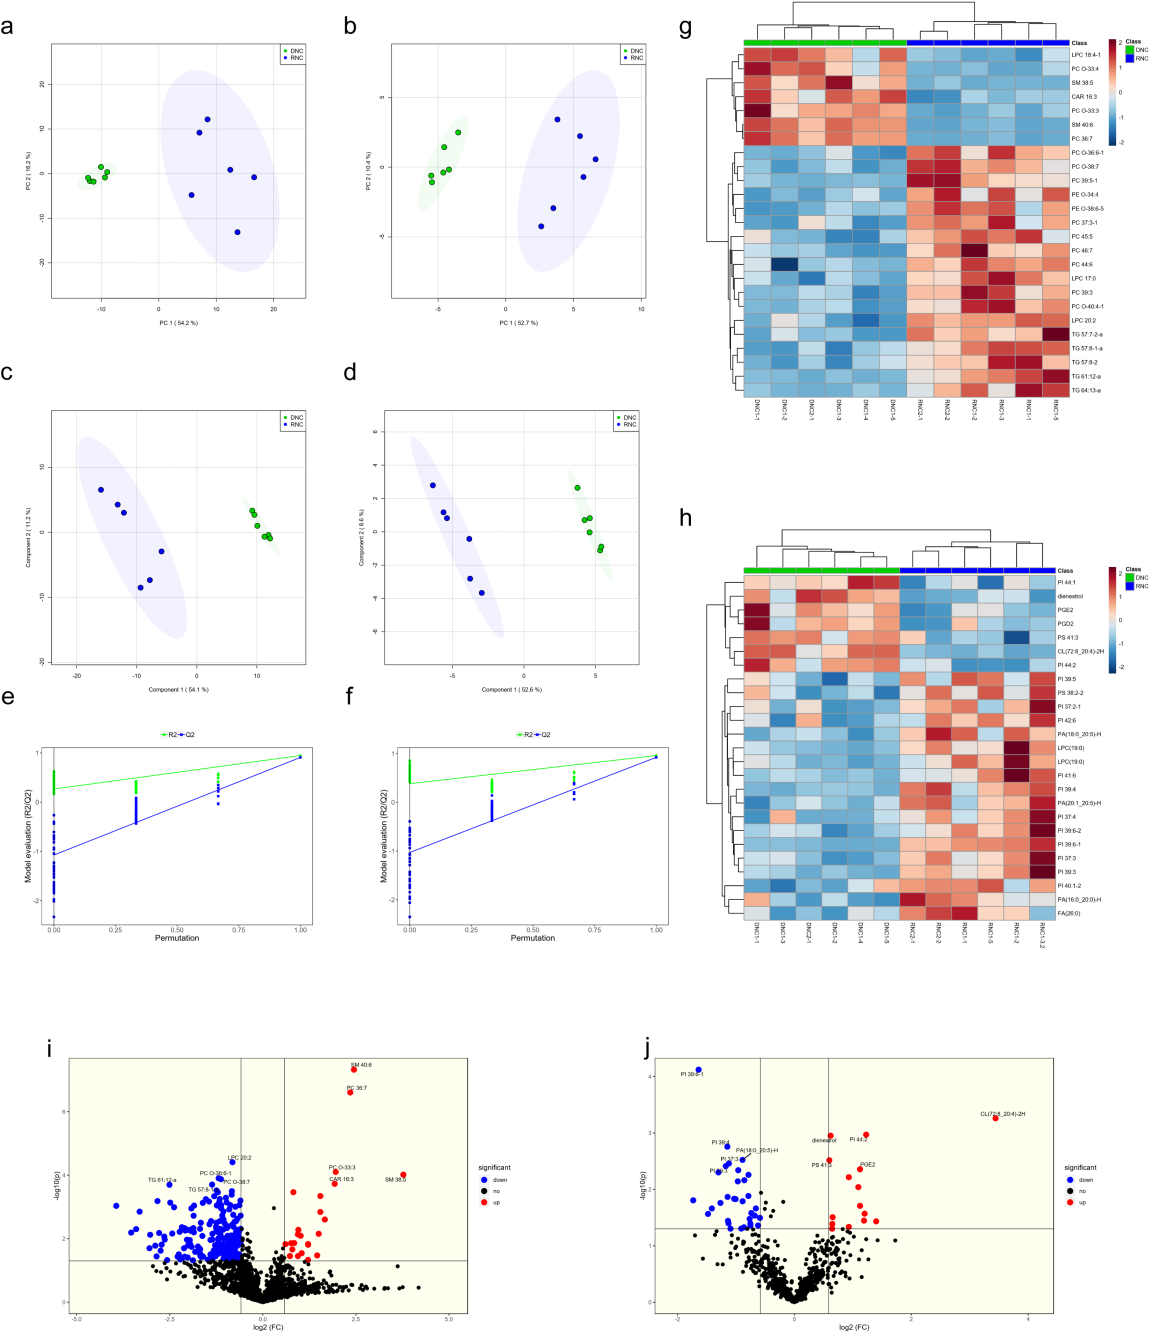
**

Figure S3. Metabolomics Profile of DNC versus RNC (a, b) Scores scatter plot of PCA; (c-f) Scores scatter plot of PLS-DA; (g, h) cluster analysis (heatmap);

(i, j )Volcano plot.
